# Supplementary material for: First Genome-Wide Association Study of Latent Autoimmune Diabetes in Adults Reveals Novel Insights Linking Immune and Metabolic Diabetes
Source: Oxford University Press journal article supplement (doi:10.2337/dc18-1032), 2018-09-25
Supplement: dc181032supplementarydata2.xlsx [file dc181032supplementarydata2.xlsx]

## Sheet: ST1. Cohort_information
Cohort	Full name	LADA, T1D, T2D, or population controls	Recruitment location	Population	Inclusion criteria	Exclusion criteria	N	Age (mean, range)	% Male/Female	GADA measurement method, notes	Genotyping chip	Genotyping QC	Imputation panel	Imputation service (Michigan/Sanger)	Imputation QC
ActionLada	ActionLada	LADA	Queen Mary University of London and the Action Lada consortium in Europe	British, German	Aged 30-70 Patients were designated with diabetes according to standard criteria, and LADA was defined as follows: patients 1) aged 30–70 years, 2) with diabetes associated autoantibodies, and 3) who did not require insulin treatment for at least 6 months post diagnosis.	Exclusion criteria were insufficient dataset, current pregnancy, renal disease with raised creatinine or proteinuria, or acute illness at the time of testing.	1051	47.7, 46.99-48.47	M57%/F37% * 6% missing info	In House RIA	Illumina Infinium II Omni Express	Individuals with ambiguous sex, genotype missingness > 5%, and relatedness (pi_hat > 0.2) were excluded. PCA was performed to exclude individuals of non-European ancestry.	HRC r1.1.2016	Michigan	SNP missing call rate <95%, SNP missing rate <95%, MAF <0.05, non-European individuals
ActionLada 'Plus'	ActionLada 'Plus'	LADA	The Mayo, Rochester, MN, USA; Cornell Medical College, New York City, NY, USA; University of Alabama, Birmingham, AL, USA; University of Pennsylvania, Philadelphia, PA, USA; MODEL Clinical Research, Baltimore, MD, USA; Adventist Health System, Sunbelt Inc. d/b/a Florida Hospital, Orlando, FL, USA; Atlanta Diabetes Associates, Atlanta, GA, USA; Geisinger Health System, Danville, PA, USA; Universit…	American and British	LADA was defined as follows: patients 1) aged 30–70 years, 2) with diabetes associated autoantibodies, and 3) who did not require insulin treatment for at least 6 months post diagnosis.	Exclusion criteria were insufficient dataset, current pregnancy, renal disease with raised creatinine or proteinuria, or acute illness at the time of testing.	441	55.33 years (25 years-88 years)	55.6%/44.1%	RIA at Northwest Lipid, Metabolism, and Diabetes Research Laboratories, Seattle Washington	Illumina Infinium II Omni Express	Individuals with ambiguous sex, genotype missingness > 5%, and relatedness (pi_hat > 0.2) were excluded. PCA was performed to exclude individuals of non-European ancestry.	HRC r1.1.2016	Michigan	SNP missing call rate <95%, SNP missing rate <95%, MAF <0.05, non-European individuals
BMDCS	Bone Mineral Density in Childhood Study	population controls	Children’s Hospital of Los Angeles (Los Angeles, CA), Cincinnati Children’s Hospital Medical Center (Cincinnati, OH), Creighton University (Omaha, NE), Children’s Hospital of Philadelphia (Philadelphia, PA), and Columbia University (New York, NY)	American of diverse ethnic backgrounds	Samples of European descent only were included	Samples of non-European ancestry were excluded.	1056	5-20 yrs at baseline	49%/51% at baseline	Not done	Illumina Infinium II Omni Express	Individuals with ambiguous sex, genotype missingness > 5%, and relatedness (pi_hat > 0.2) were excluded. PCA was performed to exclude individuals of non-European ancestry.	HRC r1.1.2016	Michigan	SNP missing call rate <95%, SNP missing rate <95%, MAF <0.05, non-European individuals
BOTNIA	Botnia study	LADA cases	Botnia region, Western Finland	Finnish	Age diagnosis <=35; No insulin within 1 year from diagnosis; GADA positive	NA	157	54.82 ± 11-72 yrs	42% Male	in-house RIP, RSR EIA	Illumina Human Core Exome	Exclude individuals: Call rate < 95%; ambiguous gender; genome-wide heterozygosity (3 SD from mean); duplicates or related individuals (pi-hat >= 0.2); average pi-hat outliers; population outliers. Exclude SNPs: monomorphic; (MAF >= 0.05 and SNP missing rate > 0.05); (MAF < 0.05 and SNP missing rate > 0.01); (MAF >= 0.05 and HWE <= 0.00000057); (MAF < 0.05 and HWE <= 0.0001)	HRC r1.1.2016	Michigan	Include: MAF > 0.01; INFO > 0.4; (MAF < 0.05 and HWE > 0.0001 or MAF >= 0.05 and HWE > 0.00000057)
GoDARTS	Genetics of Diabetes Audit and Research	LADA/T2D/Population CTL	Univeersity of Dundee	Scottish	Age diagnosis <35; No insulin within 1 year diagnosis; GADA positive	NA	206	mean 58.54 STD 12.42	49.0% Male	RSR ELISA (RS-GDE96-F)	Affymatrix 6; Illumina Infinium II Omni Express	ambiguous sex or geno-pheno sex discrepancy, genotype missingness > 2%, and relatedness (pi_hat > 0.125) were excluded. PCA was performed to exclude individuals of non-European ancestry.	HRC r1.1.2016	Sanger	None
HUNT	The Nord-Trøndelag Health Study	LADA	HUNT Research Centre, Department of Public Health and Nursing, Faculty of Medicine and Health Sciences, the Norwegian University of Science and Technology, Norway	Norwegian	Self-reported yes to having diabetes, positive for GAD antibodies, initial age at diagnosis >30 years old and no insulin treatment within one year of diagnosis.	NA	139	Mean 67.5 and range 57.4	53.2% Male	AntiGAD was measured by immuno-precipitation using translation labeled 3H-GAD65 as labeled reagent (Novo Nordisk, Denmark). Separation of bound antiGAD and free labeled antigen was done by protein A coupled to Sepharose (procedure developed at the Hormone laboratory). Antibody levels were expressed as an antibody index (ai) relative to a standard serum given by the formula [(counts per minute (cp…	IlluminaHumanCore arrays (UM_HUNT_Biobank_11788091, HumanCoreExome-12-v1-0, and HumanCoreE xome-12-v1-1)	Samples that failed to reach a 99% call rate, had contamination > 2.5% as estimated with BAF Regress, large chromosomal copy number variants, lower call rate of a technical duplicate pair and twins, gonosomal constellations other than XX and XY, or whose inferred sex contradicted the reported gender, were excluded. Samples that passed quality control were analysed in a second round of genotype ca…	chr1-22: HRC.r1-1 + 2,200 whole-genome sequenced HUNT samples; chrX: HRC.r1-1	Michigan	Imputation was performed on the samples of recent European ancestry using Minimac3 (v2.0.1, http://genome.sph.umich.edu/wiki/Minimac3) and the Haplotype Reference Consortium reference panel (release version 1.1). A maximal set of relatively unrelated individuals (kinship coefficient < 0.0884) was chosen using KING and FastIndep.
		T2D			Self-reported yes to having diabetes, GAD antibodies negative, initial age at diagnosis >30 years old and no insulin treatment within one year of diagnosis. Age and gender matched to the LADA cases.	NA	695	Mean 67.2 and range 55.0	53.2% Male		IlluminaHumanCore arrays (UM_HUNT_Biobank_11788091, HumanCoreExome-12-v1-0, and HumanCoreE xome-12-v1-1)		chr1-22: HRC.r1-1 + 2,200 whole-genome sequenced HUNT samples; chrX: HRC.r1-1	Michigan
		Non-diabetic population controls			Self-reported no to ever having diabetes, and had non-fasting serum glucose <7.0 mmol/l. Age and gender matched to the LADA cases.	NA	695	Mean 67.5 and range 57.8	53.2% Male		IlluminaHumanCore arrays (UM_HUNT_Biobank_11788091, HumanCoreExome-12-v1-0, and HumanCoreE xome-12-v1-1)		chr1-22: HRC.r1-1 + 2,200 whole-genome sequenced HUNT samples; chrX: HRC.r1-1	Michigan
ANDIS	All New Diabetics In Scania	LADA cases	Scania, Sweden	Swedish	Age at onset ≥ 35 years, GAD (ELISA) > 10 kE/L, GAD (RIA) >50 U/ml	Non-Scandinavians excluded	440	LADA: 59(35-94)	55/45	Enzyme-Linked Immunosorbent Assay (ELISA) or Radioimmunoassay at Clinical Chemistry in Malmö	Illumina Infinium Omni Express Exome	Exclude individuals: Call rate < 95%; ambiguous gender; genome-wide heterozygosity (3 SD from mean); duplicates or related individuals (pi-hat >= 0.2); average pi-hat outliers; population outliers. Exclude SNPs: monomorphic; (MAF >= 0.05 and SNP missing rate > 0.05); (MAF < 0.05 and SNP missing rate > 0.01); (MAF >= 0.05 and HWE <= 0.00000057); (MAF < 0.05 and HWE <= 0.0001)	HRC r1.1.2016	Michigan	Include: MAF > 0.01; INFO > 0.4; (MAF < 0.05 and HWE > 0.0001 or MAF >= 0.05 and HWE > 0.00000057)
DIREVA	Diabetes Registry Vasa	LADA cases/ T1D cases/ T2D cases	Vasa, Finland	Finnish	LADA: Age at onset ≥ 35 years, C-peptide (KLU) > 0.2 nmol/L, GAD65a (EIA) ≥ 10 U/ml; T1D: Age at onset < 35 years, C-peptide (KLU) < 0.2 nmol/L; T2D: Age at onset ≥ 35 years, C-peptide (KLU) ≥ 0.2 nmol/L, GAD65a (EIA) < 10 U/ml.	NA	3290 (LADA 139, T1D 365 , T2D 2786)	LADA 57.84 ±10.22; T1D 15.80 ±9.03; T2D 59.63 ± 10.29	LADA 46.3% Male; T1D 53.0% Male; T2D 56.5% Male	Enzyme Immunoassay (EIA)	Illumina Human CoreExome	Exclude individuals: Call rate < 95%; ambiguous gender; genome-wide heterozygosity (3 SD from mean); duplicates or related individuals (pi-hat >= 0.2); average pi-hat outliers; population outliers. Exclude SNPs: monomorphic; (MAF >= 0.05 and SNP missing rate > 0.05); (MAF < 0.05 and SNP missing rate > 0.01); (MAF >= 0.05 and HWE <= 0.00000057); (MAF < 0.05 and HWE <= 0.0001)	HRC r1.1.2016	Michigan	Include: MAF > 0.01; INFO > 0.4; (MAF < 0.05 and HWE > 0.0001 or MAF >= 0.05 and HWE > 0.00000057)
Malmö controls	Malmö controls	Non-diabetic population controls	Malmö, Sweden	Swedish	NA	Diabetics excluded	3126	72.5(5.6) range 61-85	41/59	Not done	Illumina Infinium Omni Express Exome	Exclude individuals: Call rate < 95%; ambiguous gender; genome-wide heterozygosity (3 SD from mean); duplicates or related individuals (pi-hat >= 0.2); population outliers. Exclude SNPs: monomorphic; SNP missing rate > 0.05; HWE <= 10e-6	HRC r1.1.2016	Michigan	Include: MAF > 0.01; INFO > 0.4; (MAF < 0.05 and HWE > 0.0001 or MAF >= 0.05 and HWE > 0.00000057)
SDR	Scania Diabetes Registry	LADA cases/ T1D cases/ T2D cases	Scania, Sweden	Swedish	SDR: GAD (Wallenberg lab (AU ref < 5.0), GAD (Wallenberg lab (IU/ml ref <32), C-peptide (Klin kem (RIA) ref 0.25-0.75), C-peptide (Klin kem ref 0.3-1.3), C-peptide (Lund (ref 0.25-0.75); LADA: Age at onset ≥ 35, GAD ≥ 10 AU, GAD ≥ 50 IU/ml; T1D: Age at onset < 35, GAD ≥ 20 AU, GAD ≥ 100 IU/ml, C-peptide ≥ 0.25 (Klin kem (RIA)), C-peptide ≥ 0.3 (Klin kem), C-peptide ≥ 0.25 (Lund); T2D: BMI > 25, G…	Non-Scandinavians excluded	3567	LADA only: 59( 36-90)	57/43	Radioimmunoassay	Illumina Infinium Omni Express Exome + ???	Exclude individuals: Call rate < 95%; ambiguous gender; genome-wide heterozygosity (3 SD from mean); duplicates or related individuals (pi-hat >= 0.2); average pi-hat outliers; population outliers. Exclude SNPs: monomorphic; (MAF >= 0.05 and SNP missing rate > 0.05); (MAF < 0.05 and SNP missing rate > 0.01); (MAF >= 0.05 and HWE <= 0.00000057); (MAF < 0.05 and HWE <= 0.0001)	HRC r1.1.2016	Michigan	Include: MAF > 0.01; INFO > 0.4; (MAF < 0.05 and HWE > 0.0001 or MAF >= 0.05 and HWE > 0.00000057)
Copenhagen controls	See below	See below	See below	Danish	Danish non-diabetic individuals	DM	1974	64.42 (range, 34.44)	49.9% male	Not done	Illumina Human Core Exome	Prior to imputation we removed variants that had a missingness of more than 5% (across batches), a minor allele frequency of less than 5%, or a hardy-weinberg equilibrium pvalue < 10e-5. A total of 3194 individuals and 107808 markers (with an average genotyping rate of 0.999) passed QC. Only a subset of the imputed individuals is included in the association analysis (476 LADA vs. 1807 controls).	Haplotype Reference Consortium (r1.1)	Sanger	None
	The 1936 birth cohort	population controls	The samples were collected from four municipalities nearby Glostrup Hospital, Denmark	Danish	Danish non-diabetic individuals	DM	624 non-diabetic individuals (502 NGTs, 122 IFG/IGTs)	See above	See above	See above	See above	See above	See above	See above	See above
	ADDITION-PRO	controls	The samples were collected in 2009–2011 from four Danish research centres (Steno Diabetes Center, Aarhus University Hospital, Holstebro Hospital, and Hospital of South West Jutland, Esbjerg).	Danish	Danish non-diabetic individuals	DM	1350 non-diabetic individuals (812 NGTs, 538 IFG/IGTs)	See above	See above	See above	See above	See above	See above	See above	See above
Copenhagen LADA	See below	See below	See below	Danish	The following inclusion criteria for LADA have been applied in all sub-cohorts: GADA positive, ≥20 years at the time of diagnosis, and treated without insulin for the first year after diagnosis or having fasting serum C-peptide ≥300 pmol/L at the time of investigation.	NA	539	58.32 (range, 67.31)	56.2% male		Illumina Human Core Exome	Prior to imputation we removed variants that had a missingness of more than 5% (across batches), a minor allele frequency of less than 5%, or a hardy-weinberg equilibrium pvalue < 10e-5. A total of 3194 individuals and 107808 markers (with an average genotyping rate of 0.999) passed QC. Only a subset of the imputed individuals is included in the association analysis (476 LADA vs. 1807 controls).	Haplotype Reference Consortium (r1.1)	Sanger	None
	Danish Centre for strategic Research in Type 2 Diabetes (DD2)	LADA	Denmark	Danish	See above	See above	158	See above	See above	AESKULISA	See above	See above	See above	See above	See above
	Vejle Biobank	LADA	Vejle county, Denmark	Danish	See above	See above	124	See above	See above	AESKULISA	See above	See above	See above	See above	See above
	OUH	LADA	Odense University hospital, Denmark	Danish	See above	See above	66	See above	See above	RSR RIA	See above	See above	See above	See above	See above
	CIMT	LADA	Eight hospitals in the capital region of Denmark	Danish	See above	See above	31	See above	See above	RSR ELISA	See above	See above	See above	See above	See above
	Inter99	LADA	Capital region, Denmark	Danish	See above	See above	19	See above	See above	RSR ELISA	See above	See above	See above	See above	See above
	SDC	LADA	Steno Diabetes Center, Gentofte, Denmark	Danish	See above	See above	141	See above	See above	RSR ELISA (n=52) or AESKULISA (n=89)	See above	See above	See above	See above	See above

## Sheet: ST2. Cohort info GWAMA
LADACTRL				totals	2634	5947		7868002
Cohort	directly_genotyped_markers_lambda	directly_genotyped_markers_count	imputed_markers_lambda	imputed_markers_count	N LADA	N Ctrls		total markers
Swedish	1.0297	575268	1.0131	7131633	805	3126		7706901
ActionLADA	1.1662	5397740	1.0000	0	1353	1014		5397740
Danish	1.0000	0	1.0274	5271474	476	1807		5271474
LADAT1D				totals	2454	968		8328843
Cohort	directly_genotyped_markers_lambda	directly_genotyped_markers_count	imputed_markers_lambda	imputed_markers_count	N LADA	N T1D		total markers
Swedish + ActionLADA	1.0301	575963	1.0286	7137816	2158	603		7713779
Finnish	1.0359	254991	1.0314	7607304	296	365		7862295
LADAT2D				totals	2779	10396		8465706
Cohort	directly_genotyped_markers_lambda	directly_genotyped_markers_count	imputed_markers_lambda	imputed_markers_count	N LADA	N T2D		total markers
Swedish + ActionLADA	1.0621	575855	1.0399	7142626	2158	2599		7718481
Finnish	1.0251	255224	1.0216	7614587	296	2786		7869811
GODARTS-Illumina	1.0000	0	0.9854	5386729	97	2098		5386729
GODARTS-Affymetrix	1.0000	0	0.9774	5383813	89	2218		5383813
HUNT	1	0	1.0242	5546184	139	695		5546184

## Sheet: ST3. Power calculations
LADA	Assuming disease prevalence of 0.0036
MAF	1.1	1.2	1.3	1.4	1.5	OR
0.1	0	0.017	0.254	0.758	0.976
0.2	0.001	0.13	0.764	0.992	1
0.3	0.002	0.27	0.917	0.999	1
0.4	0.003	0.346	0.948	1	1
0.5	0.003	0.342	0.939	0.999	1
T1D	Assuming disease prevalence of 0.0033
	1.1	1.2	1.3	1.4	1.5
0.1	0	0.017	0.253	0.758	0.976
0.2	0.001	0.129	0.763	0.992	1
0.3	0.002	0.27	0.917	0.999	1
0.4	0.003	0.346	0.948	1	1
0.5	0.003	0.342	0.939	0.999	1
T2D	Assuming disease prevalence of 0.045
	1.1	1.2	1.3	1.4	1.5
0.1	0	0.017	0.253	0.758	0.976
0.2	0.001	0.174	0.84	0.997	1
0.3	0.003	0.345	0.954	1	1
0.4	0.005	0.43	0.974	1	1
0.5	0.005	0.426	0.968	1	1
Power calculations using CaTS calculator. (http://csg.sph.umich.edu/abecasis/cats/) Number of cases: 2700, number of controls: 5500, siginficance level: 0.00000005

## Sheet: ST4. DEPICT gene set enrichment
Original gene set ID	Original gene set description	Nominal P value	False discovery rate < 5%
MP:0005078	abnormal cytotoxic T cell physiology	6.392050756152362E-7	No
ENSG00000131153	GINS2 subnetwork	6.831906167186059E-7	No
ENSG00000149554	CHEK1 subnetwork	2.4112300782609263E-6	No
KEGG_CELL_CYCLE	KEGG_CELL_CYCLE	1.167060661597533E-5	No
ENSG00000123374	CDK2 subnetwork	1.5134405393984029E-5	No
ENSG00000141510	TP53 subnetwork	3.3278645938795204E-5	No
ENSG00000170312	CDK1 subnetwork	4.7804427259864314E-5	No
ENSG00000198793	MTOR subnetwork	6.033061576284825E-5	No
MP:0004045	abnormal cell cycle checkpoint function	8.530507444075175E-5	No
ENSG00000134259	NGF subnetwork	9.766130694891428E-5	No
REACTOME_P75NTR_SIGNALS_VIA_NF:KB	REACTOME_P75NTR_SIGNALS_VIA_NF:KB	9.993223369229652E-5	No
GO:0007260	tyrosine phosphorylation of STAT protein	1.0062599514995297E-4	No
MP:0003333	liver fibrosis	1.1216483195977784E-4	No
REACTOME_NF:KB_IS_ACTIVATED_AND_SIGNALS_SURVIVAL	REACTOME_NF:KB_IS_ACTIVATED_AND_SIGNALS_SURVIVAL	1.1835261276179684E-4	No
ENSG00000127314	RAP1B subnetwork	1.2667463024732778E-4	No
GO:0051247	positive regulation of protein metabolic process	1.3751275423036423E-4	No
REACTOME_PI3K_CASCADE	REACTOME_PI3K_CASCADE	1.3805422589704264E-4	No
MP:0008501	increased IgG2b level	1.79794728734558E-4	No
MP:0001654	hepatic necrosis	1.9061302398066347E-4	No
ENSG00000180228	PRKRA subnetwork	2.1493711536512902E-4	No
GO:0042509	regulation of tyrosine phosphorylation of STAT protein	2.224841204163228E-4	No
ENSG00000168040	FADD subnetwork	2.517183281857248E-4	No
ENSG00000120008	WDR11 subnetwork	2.669085423364519E-4	No
GO:0032270	positive regulation of cellular protein metabolic process	2.820306288559864E-4	No
MP:0002020	increased tumor incidence	2.8370565193531604E-4	No
ENSG00000171861	RNMTL1 subnetwork	3.582084906588897E-4	No
ENSG00000138376	BARD1 subnetwork	3.637872287864914E-4	No
MP:0002834	decreased heart weight	3.735343294545534E-4	No
MP:0002495	increased IgA level	3.8045014783187744E-4	No
ENSG00000127191	TRAF2 subnetwork	3.9249419620622934E-4	No
ENSG00000153201	RANBP2 subnetwork	4.8339005024301823E-4	No
GO:0042516	regulation of tyrosine phosphorylation of Stat3 protein	5.02414033306084E-4	No
ENSG00000185658	BRWD1 subnetwork	5.105468121064273E-4	No
ENSG00000163539	CLASP2 subnetwork	5.416443048173604E-4	No
ENSG00000134057	CCNB1 subnetwork	5.663474461993566E-4	No
ENSG00000066117	SMARCD1 subnetwork	5.726031566784144E-4	No
ENSG00000132646	PCNA subnetwork	5.766366596010028E-4	No
ENSG00000142856	ITGB3BP subnetwork	5.893466336687037E-4	No
MP:0001861	lung inflammation	5.987211698483684E-4	No
ENSG00000104823	ECH1 subnetwork	6.189747359806798E-4	No
REACTOME_ASSEMBLY_OF_HIV_VIRION	REACTOME_ASSEMBLY_OF_HIV_VIRION	6.410037867965354E-4	No
ENSG00000123219	CENPK subnetwork	6.44827511923075E-4	No
ENSG00000115163	CENPA subnetwork	6.679466333479549E-4	No
ENSG00000206215	ENSG00000206215 subnetwork	6.8108642542429E-4	No
ENSG00000206287	RING1 subnetwork	6.8108642542429E-4	No
ENSG00000204227	RING1 subnetwork	6.8108642542429E-4	No
ENSG00000100368	CSF2RB subnetwork	6.881944992231684E-4	No
GO:0001819	positive regulation of cytokine production	6.893167799794463E-4	No
MP:0005334	abnormal fat pad morphology	7.367103906616982E-4	No
ENSG00000198961	PJA2 subnetwork	8.300331077997036E-4	No
ENSG00000130338	TULP4 subnetwork	8.562629103445913E-4	No
MP:0005166	decreased susceptibility to injury	8.791517924398403E-4	No
ENSG00000153044	CENPH subnetwork	9.018505956900736E-4	No
MP:0011099	complete lethality throughout fetal growth and development	9.192833394821734E-4	No
ENSG00000137285	TUBB2B subnetwork	9.231761933422088E-4	No
ENSG00000157106	SMG1 subnetwork	9.847467139062344E-4	No
ENSG00000166793	YPEL4 subnetwork	9.959234250366228E-4	No
REACTOME_MEMBRANE_BINDING_AND_TARGETTING_OF_GAG_PROTEINS	REACTOME_MEMBRANE_BINDING_AND_TARGETTING_OF_GAG_PROTEINS	0.0010086745574451987	No
REACTOME_PURINE_METABOLISM	REACTOME_PURINE_METABOLISM	0.0010087778153928374	No
REACTOME_ASSOCIATION_OF_LICENSING_FACTORS_WITH_THE_PRE:REPLICATIVE_COMPLEX	REACTOME_ASSOCIATION_OF_LICENSING_FACTORS_WITH_THE_PRE:REPLICATIVE_COMPLEX	0.0010378089508995502	No
MP:0000598	abnormal liver morphology	0.001053632937579747	No
ENSG00000159110	IFNAR2 subnetwork	0.0010598814462848486	No
ENSG00000175745	NR2F1 subnetwork	0.0010757061202962684	No
ENSG00000145041	VPRBP subnetwork	0.0011184066429111988	No
ENSG00000106443	PHF14 subnetwork	0.0011377910069202252	No
REACTOME_SIGNALING_BY_FGFR	REACTOME_SIGNALING_BY_FGFR	0.0011606493069556527	No
MP:0008049	increased memory T cell number	0.001168365463216172	No
ENSG00000186298	PPP1CC subnetwork	0.0011815907475439882	No
MP:0005025	abnormal response to infection	0.0011840441509109127	No
ENSG00000070423	RNF126 subnetwork	0.0012485055845320463	No
ENSG00000142166	IFNAR1 subnetwork	0.0012505597804950653	No
ENSG00000116478	HDAC1 subnetwork	0.0012905815399096492	No
MP:0002022	increased lymphoma incidence	0.0013144495139567885	No
ENSG00000169139	UBE2V2 subnetwork	0.0013216364599497425	No
GO:0042503	tyrosine phosphorylation of Stat3 protein	0.0013291368699886383	No
MP:0001541	abnormal osteoclast physiology	0.0013312056010824182	No
ENSG00000185291	IL3RA subnetwork	0.0013772463675849442	No
ENSG00000027697	IFNGR1 subnetwork	0.0014072482126248906	No
ENSG00000157456	CCNB2 subnetwork	0.0014249928729733528	No
MP:0008102	lymph node hyperplasia	0.0014387851864335539	No
ENSG00000156587	UBE2L6 subnetwork	0.0014445193067214855	No
ENSG00000004478	FKBP4 subnetwork	0.0014745096992259917	No
ENSG00000031691	CENPQ subnetwork	0.0015114329868360554	No
ENSG00000100401	RANGAP1 subnetwork	0.0015237202800533407	No
ENSG00000204217	BMPR2 subnetwork	0.0015511907169660742	No
REACTOME_CYTOKINE_SIGNALING_IN_IMMUNE_SYSTEM	REACTOME_CYTOKINE_SIGNALING_IN_IMMUNE_SYSTEM	0.001557674109412285	No
KEGG_JAK_STAT_SIGNALING_PATHWAY	KEGG_JAK_STAT_SIGNALING_PATHWAY	0.0015826718576369004	No
ENSG00000184557	SOCS3 subnetwork	0.0016013408323928215	No
ENSG00000105397	TYK2 subnetwork	0.001649486694585599	No
ENSG00000163624	CDS1 subnetwork	0.0017010024510352895	No
GO:0010888	negative regulation of lipid storage	0.0017499997506888621	No
ENSG00000116678	LEPR subnetwork	0.0017616196272644798	No
ENSG00000149503	INCENP subnetwork	0.0017747424192467106	No
ENSG00000177156	TALDO1 subnetwork	0.0017809541170792501	No
ENSG00000162231	NXF1 subnetwork	0.0018046138704191342	No
ENSG00000151725	MLF1IP subnetwork	0.0018071676493870965	No
ENSG00000169194	IL13 subnetwork	0.0018209285014778398	No
ENSG00000204133	ENSG00000204133 subnetwork	0.001822486001065126	No
ENSG00000100162	CENPM subnetwork	0.001825679145385811	No
ENSG00000013561	RNF14 subnetwork	0.0018269196650158078	No
MP:0002418	increased susceptibility to viral infection	0.0018338582673377154	No
ENSG00000132842	AP3B1 subnetwork	0.0018472733656992987	No
ENSG00000090273	NUDC subnetwork	0.0018875173869643896	No
ENSG00000138092	CENPO subnetwork	0.0019262417059811986	No
MP:0008500	increased IgG2a level	0.00199534286201182	No
MP:0001120	abnormal uterus morphology	0.0020058539375463137	No
GO:0032494	response to peptidoglycan	0.0020063825870220093	No
ENSG00000158773	USF1 subnetwork	0.0020203804521553024	No
ENSG00000152253	SPC25 subnetwork	0.002024001918605947	No
ENSG00000154839	SKA1 subnetwork	0.002046972356956662	No
ENSG00000197579	TOPORS subnetwork	0.00206529863416371	No
ENSG00000102384	CENPI subnetwork	0.002072945500680097	No
ENSG00000188312	CENPP subnetwork	0.0020761380142257503	No
ENSG00000134107	BHLHE40 subnetwork	0.002077741200494271	No
ENSG00000117400	MPL subnetwork	0.002092067973980481	No
ENSG00000096401	CDC5L subnetwork	0.002109419848348334	No
ENSG00000119535	CSF3R subnetwork	0.0021164226032417644	No
ENSG00000168610	STAT3 subnetwork	0.0021228233989522634	No
ENSG00000134690	CDCA8 subnetwork	0.0021632217165192557	No
MP:0008973	decreased erythroid progenitor cell number	0.002190842228853726	No
ENSG00000125912	NCLN subnetwork	0.0022118494946976558	No
ENSG00000120696	KBTBD7 subnetwork	0.002241670029783879	No
ENSG00000003096	KLHL13 subnetwork	0.002273217315145814	No
ENSG00000147168	IL2RG subnetwork	0.002276802988523976	No
ENSG00000185214	ENSG00000185214 subnetwork	0.0023012318076910884	No
ENSG00000133101	CCNA1 subnetwork	0.002333515249155373	No
GO:0034097	response to cytokine stimulus	0.0023682082943936355	No
ENSG00000102901	CENPT subnetwork	0.00240445101165616	No
MP:0001873	stomach inflammation	0.002407191290972122	No
ENSG00000131724	IL13RA1 subnetwork	0.002495150588875291	No
ENSG00000082898	XPO1 subnetwork	0.0025061962281719098	No
ENSG00000166451	CENPN subnetwork	0.002637213910153003	No
GO:0008186	RNA-dependent ATPase activity	0.0026732697036002196	No
ENSG00000117697	NSL1 subnetwork	0.002722503688866898	No
ENSG00000100385	IL2RB subnetwork	0.002732945444278623	No
ENSG00000141200	KIF2B subnetwork	0.0027652631429719112	No
ENSG00000072864	NDE1 subnetwork	0.002802283328866528	No
ENSG00000110092	CCND1 subnetwork	0.0028138182596207074	No
MP:0008115	abnormal dendritic cell differentiation	0.002849592898955634	No
ENSG00000109618	SEPSECS subnetwork	0.002859302924880929	No
REACTOME_REGULATION_OF_IFNG_SIGNALING	REACTOME_REGULATION_OF_IFNG_SIGNALING	0.0028646175643447826	No
REACTOME_CELL_CYCLE	REACTOME_CELL_CYCLE	0.0028700080953405894	No
ENSG00000142677	IL22RA1 subnetwork	0.0029032172902643243	No
ENSG00000186871	ERCC6L subnetwork	0.0029518831601779596	No
ENSG00000120334	CENPL subnetwork	0.00295339993857343	No
MP:0003103	liver degeneration	0.003108730146249386	No
ENSG00000105197	TIMM50 subnetwork	0.003141141734005924	No
ENSG00000160712	IL6R subnetwork	0.0031704427746705416	No
ENSG00000168685	IL7R subnetwork	0.0031829319265075234	No
ENSG00000121621	KIF18A subnetwork	0.0032706484646629454	No
GO:0042531	positive regulation of tyrosine phosphorylation of STAT protein	0.003304067182851919	No
ENSG00000145623	OSMR subnetwork	0.0033410066900947492	No
ENSG00000137070	IL11RA subnetwork	0.0033410066900947492	No
ENSG00000110324	IL10RA subnetwork	0.003477174093838985	No
GO:0008629	induction of apoptosis by intracellular signals	0.003515376690478548	No
ENSG00000163535	SGOL2 subnetwork	0.0035214327279927886	No
ENSG00000141646	SMAD4 subnetwork	0.0035303131503478455	No
ENSG00000117153	KLHL12 subnetwork	0.0036223800592832304	No
ENSG00000117748	RPA2 subnetwork	0.003641208843249837	No
ENSG00000074054	CLASP1 subnetwork	0.003643223984180905	No
MP:0001300	ocular hypertelorism	0.0037148042684316527	No
GO:0070555	response to interleukin-1	0.0037164614295865906	No
ENSG00000123496	IL13RA2 subnetwork	0.003744644414532389	No
ENSG00000103522	IL21R subnetwork	0.003744644414532389	No
ENSG00000164485	IL22RA2 subnetwork	0.003744644414532389	No
ENSG00000159128	IFNGR2 subnetwork	0.003764852980536309	No
MP:0002500	granulomatous inflammation	0.0038183910977301096	No
GO:0006916	anti-apoptosis	0.003824312335183997	No
ENSG00000166579	NDEL1 subnetwork	0.0038479373210244783	No
ENSG00000124334	IL9R subnetwork	0.0038849815746262706	No
ENSG00000077150	NFKB2 subnetwork	0.003941370881560481	No
GO:0035145	exon-exon junction complex	0.004061236711859493	No
ENSG00000159113	ENSG00000159113 subnetwork	0.004072357263896324	No
ENSG00000174442	ZWILCH subnetwork	0.004105641091277647	No
ENSG00000133657	ATP13A3 subnetwork	0.004106701232043724	No
ENSG00000158517	NCF1 subnetwork	0.004172156765917844	No
ENSG00000170677	SOCS6 subnetwork	0.004203334069618177	No
ENSG00000111602	TIMELESS subnetwork	0.004210002007363245	No
ENSG00000161888	SPC24 subnetwork	0.004227591195367589	No
ENSG00000113594	LIFR subnetwork	0.00424341428069413	No
KEGG_APOPTOSIS	KEGG_APOPTOSIS	0.004248417751830723	No
GO:0035004	phosphatidylinositol 3-kinase activity	0.0042729683590800455	No
GO:0016303	1-phosphatidylinositol-3-kinase activity	0.0042729683590800455	No
ENSG00000154473	BUB3 subnetwork	0.0042884110081690165	No
ENSG00000016402	IL20RA subnetwork	0.004321939091708641	No
ENSG00000162594	IL23R subnetwork	0.004328131363040921	No
ENSG00000120253	NUP43 subnetwork	0.004328248685580711	No
ENSG00000185436	IL28RA subnetwork	0.004336371621856009	No
ENSG00000135074	ADAM19 subnetwork	0.004342496075613723	No
ENSG00000120833	SOCS2 subnetwork	0.004378981297337237	No
ENSG00000082641	NFE2L1 subnetwork	0.0043832706047769844	No
ENSG00000206206	DAXX subnetwork	0.00439030036516465	No
ENSG00000204209	DAXX subnetwork	0.00439030036516465	No
ENSG00000206279	DAXX subnetwork	0.00439030036516465	No
ENSG00000125952	MAX subnetwork	0.004418668311740921	No
GO:0070851	growth factor receptor binding	0.004419010035120035	No
ENSG00000081985	IL12RB2 subnetwork	0.0044243490588566	No
REACTOME_MITOTIC_G1:G1S_PHASES	REACTOME_MITOTIC_G1:G1S_PHASES	0.0044498076311826635	No
MP:0002643	poikilocytosis	0.004459786511606506	No
ENSG00000129521	EGLN3 subnetwork	0.004460485822730022	No
ENSG00000160783	PMF1 subnetwork	0.004494384206389642	No
ENSG00000143228	NUF2 subnetwork	0.004578256855816074	No
ENSG00000124702	KLHDC3 subnetwork	0.004630437465471986	No
ENSG00000090659	CD209 subnetwork	0.004652975199163309	No
ENSG00000163960	UBXN7 subnetwork	0.004665263401527828	No
ENSG00000180008	SOCS4 subnetwork	0.004686902642718558	No
GO:0004896	cytokine receptor activity	0.004734514947958361	No
MP:0008173	increased follicular B cell number	0.0047521185989667335	No
MP:0005631	decreased lung weight	0.004754589826765728	No
GO:0043560	insulin receptor substrate binding	0.004760619135819029	No
ENSG00000136931	NR5A1 subnetwork	0.004773120579076485	No
GO:0034061	DNA polymerase activity	0.004791408327689195	No
MP:0002177	abnormal outer ear morphology	0.004807210918799295	No
GO:0031965	nuclear membrane	0.004810246102388106	No
ENSG00000091831	ESR1 subnetwork	0.004831823740258808	No
ENSG00000071794	HLTF subnetwork	0.004843215974574582	No
ENSG00000143772	ITPKB subnetwork	0.004892877957008839	No
ENSG00000153207	AHCTF1 subnetwork	0.004921663416684042	No
ENSG00000185104	FAF1 subnetwork	0.004924383388692521	No
ENSG00000083544	TDRD3 subnetwork	0.004924827091328366	No
ENSG00000089685	BIRC5 subnetwork	0.0049570832555190505	No
ENSG00000075188	NUP37 subnetwork	0.0049719653755154036	No
ENSG00000148672	GLUD1 subnetwork	0.005022258778726649	No
GO:0004004	ATP-dependent RNA helicase activity	0.005023409490496097	No
ENSG00000165288	BRWD3 subnetwork	0.005093682258025177	No
MP:0008641	increased circulating interleukin-1 beta level	0.00512717385408697	No
ENSG00000175505	CLCF1 subnetwork	0.005153851847165534	No
KEGG_LYSINE_DEGRADATION	KEGG_LYSINE_DEGRADATION	0.005230134845574026	No
ENSG00000110958	PTGES3 subnetwork	0.005242511381594806	No
MP:0005011	increased eosinophil cell number	0.00526067157922059	No
ENSG00000151461	UPF2 subnetwork	0.005321440279894658	No
ENSG00000113649	TCERG1 subnetwork	0.005327199896764565	No
ENSG00000030066	NUP160 subnetwork	0.00534251424814215	No
ENSG00000091181	IL5RA subnetwork	0.005374423621033505	No
ENSG00000124762	CDKN1A subnetwork	0.0053946624273456594	No
ENSG00000144554	FANCD2 subnetwork	0.005398885773069019	No
ENSG00000135341	MAP3K7 subnetwork	0.005405373718592754	No
ENSG00000111581	NUP107 subnetwork	0.005414949120578129	No
ENSG00000112964	GHR subnetwork	0.005423021172020613	No
ENSG00000122756	CNTFR subnetwork	0.005541205676891037	No
MP:0002052	decreased tumor incidence	0.005655154465016681	No
ENSG00000175279	APITD1 subnetwork	0.005664910890716295	No
ENSG00000132341	RAN subnetwork	0.005667139700261811	No
REACTOME_P75NTR_RECRUITS_SIGNALLING_COMPLEXES	REACTOME_P75NTR_RECRUITS_SIGNALLING_COMPLEXES	0.005714092411217522	No
ENSG00000167842	MIS12 subnetwork	0.005813421307441378	No
ENSG00000149636	DSN1 subnetwork	0.005813421307441378	No
ENSG00000137812	CASC5 subnetwork	0.0058135465330494285	No
MP:0003799	impaired macrophage chemotaxis	0.0058430760013618065	No
ENSG00000113494	PRLR subnetwork	0.005851424761259706	No
ENSG00000182957	SPATA13 subnetwork	0.005886833726234571	No
GO:0010332	response to gamma radiation	0.0059267700417500735	No
GO:0004702	receptor signaling protein serine/threonine kinase activity	0.005968406242237317	No
ENSG00000125347	IRF1 subnetwork	0.00597512867265832	No
ENSG00000138778	CENPE subnetwork	0.005999537261855233	No
MP:0002447	abnormal erythrocyte morphology	0.006113801290633958	No
REACTOME_DOWNSTREAM_SIGNALING_OF_ACTIVATED_FGFR	REACTOME_DOWNSTREAM_SIGNALING_OF_ACTIVATED_FGFR	0.00613323337710987	No
ENSG00000076928	ARHGEF1 subnetwork	0.006146879954611957	No
ENSG00000105229	PIAS4 subnetwork	0.006150502498964387	No
ENSG00000100239	PPP6R2 subnetwork	0.006193162588670233	No
ENSG00000069248	NUP133 subnetwork	0.006265723395378235	No
MP:0000708	thymus hyperplasia	0.006283150672878816	No
REACTOME_GROWTH_HORMONE_RECEPTOR_SIGNALING	REACTOME_GROWTH_HORMONE_RECEPTOR_SIGNALING	0.006297739557476109	No
ENSG00000103342	GSPT1 subnetwork	0.006331692264366849	No
ENSG00000182979	MTA1 subnetwork	0.006338558064353925	No
ENSG00000145777	TSLP subnetwork	0.006398706684306321	No
GO:0010883	regulation of lipid storage	0.006549417018265394	No
MP:0004992	increased bone resorption	0.006550882630310121	No
MP:0003179	decreased platelet cell number	0.006571272270216608	No
ENSG00000134470	IL15RA subnetwork	0.006572876846644842	No
GO:0007566	embryo implantation	0.006579344530170589	No
ENSG00000077238	IL4R subnetwork	0.006582415881088402	No
ENSG00000176658	MYO1D subnetwork	0.006640502793090294	No
ENSG00000122952	ZWINT subnetwork	0.006647577309247924	No
ENSG00000165732	DDX21 subnetwork	0.0067441049441905685	No
ENSG00000120235	IFNA6 subnetwork	0.006807890091167411	No
REACTOME_NRIF_SIGNALS_CELL_DEATH_FROM_THE_NUCLEUS	REACTOME_NRIF_SIGNALS_CELL_DEATH_FROM_THE_NUCLEUS	0.006851994040314669	No
ENSG00000198223	CSF2RA subnetwork	0.006888980059079251	No
ENSG00000067606	PRKCZ subnetwork	0.006908300345590158	No
ENSG00000088826	SMOX subnetwork	0.00692042164424017	No
ENSG00000135679	MDM2 subnetwork	0.0069231655454637595	No
GO:0034185	apolipoprotein binding	0.006935821838649954	No
ENSG00000186660	ZFP91 subnetwork	0.007033362207127838	No
GO:0032813	tumor necrosis factor receptor superfamily binding	0.0070401020425674594	No
MP:0004110	transposition of great arteries	0.007159442409520286	No
ENSG00000142208	AKT1 subnetwork	0.007224225421882102	No
ENSG00000127445	PIN1 subnetwork	0.007238567931620774	No
ENSG00000126561	STAT5A subnetwork	0.00724764230804559	No
ENSG00000147889	CDKN2A subnetwork	0.007251311669509436	No
ENSG00000109220	CHIC2 subnetwork	0.007267010287033063	No
ENSG00000101003	GINS1 subnetwork	0.007295875446934243	No
REACTOME_G1_PHASE	REACTOME_G1_PHASE	0.0073318168704528276	No
REACTOME_CYCLIN_D_ASSOCIATED_EVENTS_IN_G1	REACTOME_CYCLIN_D_ASSOCIATED_EVENTS_IN_G1	0.0073318168704528276	No
REACTOME_PI:3K_CASCADE	REACTOME_PI:3K_CASCADE	0.0073501584331729115	No
ENSG00000160551	TAOK1 subnetwork	0.007398730550894658	No
ENSG00000165280	VCP subnetwork	0.007434010389405155	No
ENSG00000166888	STAT6 subnetwork	0.007441583271991931	No
MP:0001860	liver inflammation	0.007471674088887386	No
ENSG00000183091	NEB subnetwork	0.00747450923227366	No
GO:0016799	hydrolase activity, hydrolyzing N-glycosyl compounds	0.007500901853723603	No
ENSG00000092203	TOX4 subnetwork	0.007575043902081381	No
REACTOME_INTERLEUKIN:6_SIGNALING	REACTOME_INTERLEUKIN:6_SIGNALING	0.00762175507287367	No
ENSG00000174697	LEP subnetwork	0.007696648805630697	No
REACTOME_IRS:MEDIATED_SIGNALLING	REACTOME_IRS:MEDIATED_SIGNALLING	0.00772220175781624	No
REACTOME_IRS:RELATED_EVENTS	REACTOME_IRS:RELATED_EVENTS	0.00772220175781624	No
ENSG00000134460	IL2RA subnetwork	0.007729072836682659	No
ENSG00000179262	RAD23A subnetwork	0.007853822905707889	No
ENSG00000125450	NUP85 subnetwork	0.00792127253542607	No
MP:0002060	abnormal skin morphology	0.008006125023894741	No
ENSG00000187266	EPOR subnetwork	0.008008442991754417	No
ENSG00000141582	CBX4 subnetwork	0.00805120471895275	No
REACTOME_CELL_CYCLE_MITOTIC	REACTOME_CELL_CYCLE_MITOTIC	0.008070647908000547	No
ENSG00000134352	IL6ST subnetwork	0.008132114973294281	No
ENSG00000173153	ESRRA subnetwork	0.008143485255642407	No
ENSG00000129810	SGOL1 subnetwork	0.008156235810605166	No
ENSG00000113318	MSH3 subnetwork	0.008182226745654789	No
ENSG00000184445	KNTC1 subnetwork	0.008309931804236736	No
GO:0032642	regulation of chemokine production	0.008409568414007192	No
ENSG00000130713	EXOSC2 subnetwork	0.008500937252167275	No
GO:0031347	regulation of defense response	0.00861145286509162	No
ENSG00000151065	DCP1B subnetwork	0.008728422758524425	No
MP:0002406	increased susceptibility to infection	0.00884958492781955	No
ENSG00000136485	DCAF7 subnetwork	0.008861301532534803	No
MP:0000488	abnormal intestinal epithelium morphology	0.00887487904002297	No
MP:0001869	pancreas inflammation	0.008907635473291249	No
ENSG00000039987	BEST2 subnetwork	0.008936186908229424	No
REACTOME_DEADENYLATION:DEPENDENT_MRNA_DECAY	REACTOME_DEADENYLATION:DEPENDENT_MRNA_DECAY	0.009010757672478335	No
ENSG00000080986	NDC80 subnetwork	0.009080954775750803	No
GO:0071345	cellular response to cytokine stimulus	0.009141604038269899	No
ENSG00000136634	IL10 subnetwork	0.009152924002064907	No
REACTOME_TRANSPORT_OF_MATURE_TRANSCRIPT_TO_CYTOPLASM	REACTOME_TRANSPORT_OF_MATURE_TRANSCRIPT_TO_CYTOPLASM	0.009171561012992699	No
ENSG00000138767	CNOT6L subnetwork	0.009185620819289829	No
MP:0008721	abnormal chemokine level	0.009246490541691858	No
ENSG00000116062	MSH6 subnetwork	0.009282625040854642	No
ENSG00000158186	MRAS subnetwork	0.009293924118082534	No
MP:0000709	enlarged thymus	0.00932750518835249	No
ENSG00000115290	GRB14 subnetwork	0.009338864180010875	No
GO:0032602	chemokine production	0.009354522063782187	No
ENSG00000007168	PAFAH1B1 subnetwork	0.009402741447340183	No
MP:0004532	abnormal inner hair cell stereociliary bundle morphology	0.009497696595534696	No
MP:0005232	abnormal mesenteric lymph node morphology	0.009511106125628183	No
GO:0032722	positive regulation of chemokine production	0.009536899969897348	No
MP:0005033	abnormal trophoblast giant cells	0.009541004304465662	No
REACTOME_FANCONI_ANEMIA_PATHWAY	REACTOME_FANCONI_ANEMIA_PATHWAY	0.009649684240466617	No
REACTOME_NOD12_SIGNALING_PATHWAY	REACTOME_NOD12_SIGNALING_PATHWAY	0.009782585259241671	No
ENSG00000108443	RPS6KB1 subnetwork	0.009810139442494516	No
MP:0000180	abnormal circulating cholesterol level	0.009819804994590946	No
ENSG00000136244	IL6 subnetwork	0.009855326956668789	No
MP:0000691	enlarged spleen	0.00993939595467109	No
GO:0005543	phospholipid binding	0.009987039249561538	No
ENSG00000158792	SPATA2L subnetwork	0.010082835435589329	No
REACTOME_TRANSPORT_OF_MATURE_MRNA_DERIVED_FROM_AN_INTRON:CONTAINING_TRANSCRIPT	REACTOME_TRANSPORT_OF_MATURE_MRNA_DERIVED_FROM_AN_INTRON:CONTAINING_TRANSCRIPT	0.010089432126250752	No
GO:0005126	cytokine receptor binding	0.01014868635617141	No
GO:0004715	non-membrane spanning protein tyrosine kinase activity	0.010357285133419032	No
ENSG00000213341	CHUK subnetwork	0.010407429619795077	No
ENSG00000172179	PRL subnetwork	0.01044474749004159	No
MP:0002446	abnormal macrophage morphology	0.010454431933780295	No
ENSG00000111775	COX6A1 subnetwork	0.010460599692275703	No
REACTOME_DNA_REPAIR	REACTOME_DNA_REPAIR	0.01047821612257068	No
GO:0030169	low-density lipoprotein particle binding	0.010530560345511373	No
ENSG00000004897	CDC27 subnetwork	0.01059603566026974	No
ENSG00000163513	TGFBR2 subnetwork	0.010600842579521675	No
GO:0031124	mRNA 3'-end processing	0.010605072915061587	No
ENSG00000100056	DGCR14 subnetwork	0.010767733319565485	No
MP:0005100	abnormal choroid pigmentation	0.010799831053265166	No
ENSG00000135213	POM121C subnetwork	0.010893736904322314	No
MP:0001125	abnormal oocyte morphology	0.010927050727641765	No
ENSG00000164985	PSIP1 subnetwork	0.010941408910578206	No
ENSG00000130427	EPO subnetwork	0.011073695881947197	No
MP:0002344	abnormal lymph node B cell domain morphology	0.011104366713122728	No
ENSG00000120247	ENSG00000120247 subnetwork	0.011119384759538047	No
ENSG00000147877	ENSG00000147877 subnetwork	0.011119384759538047	No
ENSG00000186809	ENSG00000186809 subnetwork	0.011119384759538047	No
ENSG00000137080	IFNA21 subnetwork	0.011119384759538047	No
ENSG00000147885	IFNA16 subnetwork	0.011119384759538047	No
ENSG00000188379	IFNA2 subnetwork	0.011119384759538047	No
ENSG00000147873	IFNA5 subnetwork	0.011119384759538047	No
ENSG00000120242	IFNA8 subnetwork	0.011119384759538047	No
ENSG00000186803	IFNA10 subnetwork	0.011119384759538047	No
ENSG00000156709	AIFM1 subnetwork	0.011135607319085927	No
ENSG00000178188	SH2B1 subnetwork	0.011210316178779588	No
GO:0005942	phosphatidylinositol 3-kinase complex	0.01123579361935194	No
GO:0007259	JAK-STAT cascade	0.011251149033480755	No
MP:0000929	open neural tube	0.011264977543217926	No
ENSG00000068796	KIF2A subnetwork	0.01134551164322143	No
ENSG00000115966	ATF2 subnetwork	0.011416834543943417	No
ENSG00000119698	PPP4R4 subnetwork	0.011548240170239758	No
GO:0003887	DNA-directed DNA polymerase activity	0.011675316216687407	No
ENSG00000149311	ATM subnetwork	0.011686386604788669	No
MP:0001577	anemia	0.011775017946232204	No
ENSG00000130939	UBE4B subnetwork	0.01186499598200521	No
ENSG00000170860	LSM3 subnetwork	0.011882262289152706	No
ENSG00000182393	IL29 subnetwork	0.011894618892867205	No
ENSG00000104432	IL7 subnetwork	0.011894618892867205	No
ENSG00000164136	IL15 subnetwork	0.011894618892867205	No
ENSG00000111536	IL26 subnetwork	0.011894618892867205	No
ENSG00000142224	IL19 subnetwork	0.011894618892867205	No
ENSG00000197110	IL28B subnetwork	0.011894618892867205	No
ENSG00000147896	IFNK subnetwork	0.011894618892867205	No
ENSG00000162892	IL24 subnetwork	0.011894618892867205	No
ENSG00000177047	IFNW1 subnetwork	0.011894618892867205	No
ENSG00000145839	IL9 subnetwork	0.011894618892867205	No
ENSG00000183709	IL28A subnetwork	0.011894618892867205	No
ENSG00000138684	IL21 subnetwork	0.011894618892867205	No
ENSG00000184995	IFNE subnetwork	0.011894618892867205	No
ENSG00000128342	LIF subnetwork	0.011894618892867205	No
GO:0019915	lipid storage	0.011909626550818064	No
MP:0000351	increased cell proliferation	0.011966379202631721	No
MP:0005466	abnormal T-helper 2 physiology	0.011974313728608573	No
GO:0042517	positive regulation of tyrosine phosphorylation of Stat3 protein	0.011980702600129458	No
ENSG00000175334	BANF1 subnetwork	0.01198322062235448	No
MP:0001672	abnormal embryogenesis/ development	0.012008934896679776	No
MP:0000024	lowered ear position	0.012067569161122843	No
ENSG00000108342	CSF3 subnetwork	0.012158075652741218	No
KEGG_CHRONIC_MYELOID_LEUKEMIA	KEGG_CHRONIC_MYELOID_LEUKEMIA	0.012179171404130192	No
ENSG00000162891	IL20 subnetwork	0.012248376436418539	No
GO:0000060	protein import into nucleus, translocation	0.012256251141412306	No
MP:0006271	abnormal involution of the mammary gland	0.012263361503544602	No
ENSG00000095752	IL11 subnetwork	0.012364282365693065	No
MP:0004500	increased incidence of ionizing radiation-induced tumors	0.01240544421587266	No
REACTOME_METABOLISM_OF_NUCLEOTIDES	REACTOME_METABOLISM_OF_NUCLEOTIDES	0.012462193062456828	No
ENSG00000172795	DCP2 subnetwork	0.012486061021025521	No
MP:0005621	abnormal cell physiology	0.012524771765485518	No
ENSG00000113520	IL4 subnetwork	0.012560053654230283	No
ENSG00000150281	CTF1 subnetwork	0.012714053068993	No
ENSG00000090863	GLG1 subnetwork	0.012765941859574909	No
MP:0005465	abnormal T-helper 1 physiology	0.012792049772301662	No
ENSG00000162924	REL subnetwork	0.012793353352685171	No
REACTOME_TAK1_ACTIVATES_NFKB_BY_PHOSPHORYLATION_AND_ACTIVATION_OF_IKKS_COMPLEX	REACTOME_TAK1_ACTIVATES_NFKB_BY_PHOSPHORYLATION_AND_ACTIVATION_OF_IKKS_COMPLEX	0.012813919609547699	No
ENSG00000089094	KDM2B subnetwork	0.012842185524353776	No
KEGG_UBIQUITIN_MEDIATED_PROTEOLYSIS	KEGG_UBIQUITIN_MEDIATED_PROTEOLYSIS	0.01284470772941386	No
ENSG00000020922	MRE11A subnetwork	0.012844724334527699	No
ENSG00000101868	POLA1 subnetwork	0.01285069248890777	No
ENSG00000110713	NUP98 subnetwork	0.01294046348501745	No
REACTOME_TRANSPORT_OF_MATURE_MRNAS_DERIVED_FROM_INTRONLESS_TRANSCRIPTS	REACTOME_TRANSPORT_OF_MATURE_MRNAS_DERIVED_FROM_INTRONLESS_TRANSCRIPTS	0.012943772386022526	No
MP:0008735	increased susceptibility to endotoxin shock	0.012981708353523481	No
GO:0016604	nuclear body	0.013121182114495707	No
ENSG00000136997	MYC subnetwork	0.013232626708405313	No
MP:0001790	abnormal immune system physiology	0.01323921381817929	No
MP:0000717	abnormal lymphocyte cell number	0.013305075626605867	No
MP:0001858	intestinal inflammation	0.013307383777309365	No
ENSG00000023734	STRAP subnetwork	0.013373154378378648	No
GO:0005643	nuclear pore	0.013382986389618164	No
MP:0008596	increased circulating interleukin-6 level	0.013543205452588523	No
MP:0000607	abnormal hepatocyte morphology	0.013566915455456602	No
ENSG00000076003	MCM6 subnetwork	0.013599052910399543	No
ENSG00000178921	PFAS subnetwork	0.01360975673988968	No
MP:0005014	increased B cell number	0.013610195730838414	No
MP:0000688	lymphoid hyperplasia	0.013621475211501565	No
ENSG00000163554	SPTA1 subnetwork	0.013647152010959597	No
ENSG00000137309	HMGA1 subnetwork	0.013717877778764445	No
ENSG00000127318	IL22 subnetwork	0.013771397148939272	No
MP:0004771	increased anti-single stranded DNA antibody level	0.013779589399932164	No
ENSG00000164399	IL3 subnetwork	0.013789450078731664	No
MP:0001807	decreased IgA level	0.013820614173978252	No
MP:0002024	T cell derived lymphoma	0.01385696015389982	No
GO:0003724	RNA helicase activity	0.013937548082338332	No
ENSG00000137074	APTX subnetwork	0.01397244892455577	No
ENSG00000164400	CSF2 subnetwork	0.014035377492825178	No
MP:0002412	increased susceptibility to bacterial infection	0.014146137457757542	No
MP:0006042	increased apoptosis	0.014153217452213845	No
ENSG00000170604	IRF2BP1 subnetwork	0.014184598201873112	No
REACTOME_SIGNALING_BY_TGF_BETA	REACTOME_SIGNALING_BY_TGF_BETA	0.014207350079127445	No
MP:0000245	abnormal erythropoiesis	0.014301094335815652	No
ENSG00000197822	OCLN subnetwork	0.014318913785903794	No
ENSG00000047410	TPR subnetwork	0.014370104323528584	No
ENSG00000185518	SV2B subnetwork	0.014392003016627634	No
ENSG00000169083	AR subnetwork	0.01439845600788322	No
GO:0007029	endoplasmic reticulum organization	0.014473135714010148	No
ENSG00000166949	SMAD3 subnetwork	0.014512602379329772	No
REACTOME_G1S_TRANSITION	REACTOME_G1S_TRANSITION	0.014534536612989113	No
ENSG00000113525	IL5 subnetwork	0.014553874735756327	No
ENSG00000178999	AURKB subnetwork	0.01457578340000756	No
REACTOME_TRANSPORT_OF_THE_SLBP_DEPENDANT_MATURE_MRNA	REACTOME_TRANSPORT_OF_THE_SLBP_DEPENDANT_MATURE_MRNA	0.014594720343017271	No
GO:0016605	PML body	0.01469993397671343	No
ENSG00000087157	PGS1 subnetwork	0.014731612398423959	No
ENSG00000117399	CDC20 subnetwork	0.014750544393612104	No
ENSG00000116161	CACYBP subnetwork	0.014765263757308541	No
ENSG00000206385	ENSG00000206385 subnetwork	0.014796857892053745	No
ENSG00000137337	MDC1 subnetwork	0.014796857892053745	No
ENSG00000153944	MSI2 subnetwork	0.014812051916628259	No
GO:0051897	positive regulation of protein kinase B signaling cascade	0.014817832954480237	No
GO:0000279	M phase	0.014903659734746817	No
GO:0031625	ubiquitin protein ligase binding	0.01490975131924934	No
ENSG00000082512	TRAF5 subnetwork	0.014940890379978328	No
ENSG00000151332	MBIP subnetwork	0.01496262551101873	No
ENSG00000196083	IL1RAP subnetwork	0.014962969777131909	No
MP:0003884	decreased macrophage cell number	0.015069924915467691	No
ENSG00000102030	NAA10 subnetwork	0.015120607226849148	No
ENSG00000062822	POLD1 subnetwork	0.015146846924973053	No
ENSG00000163468	CCT3 subnetwork	0.015159186416278923	No
ENSG00000116030	SUMO1 subnetwork	0.015287120975775805	No
ENSG00000164104	HMGB2 subnetwork	0.015305699317678258	No
ENSG00000166851	PLK1 subnetwork	0.015345652712683547	No
ENSG00000183765	CHEK2 subnetwork	0.015378893270060107	No
GO:0000793	condensed chromosome	0.015432338276680396	No
MP:0003992	increased mortality induced by ionizing radiation	0.015443728174703698	No
ENSG00000145741	BTF3 subnetwork	0.015495000459792166	No
GO:0051325	interphase	0.015536977592194214	No
REACTOME_G2M_CHECKPOINTS	REACTOME_G2M_CHECKPOINTS	0.015555218630202853	No
ENSG00000111537	IFNG subnetwork	0.015607201582194462	No
ENSG00000186842	ENSG00000186842 subnetwork	0.015619222414806412	No
REACTOME_M_PHASE	REACTOME_M_PHASE	0.015641071579105312	No
GO:0000288	nuclear-transcribed mRNA catabolic process, deadenylation-dependent decay	0.015776377407864372	No
MP:0008537	increased susceptibility to induced colitis	0.015822496853299096	No
MP:0008277	abnormal sternum ossification	0.015825590486918156	No
REACTOME_LATE_PHASE_OF_HIV_LIFE_CYCLE	REACTOME_LATE_PHASE_OF_HIV_LIFE_CYCLE	0.015933733936681425	No
GO:0043370	regulation of CD4-positive, alpha-beta T cell differentiation	0.016012845365759924	No
ENSG00000092853	CLSPN subnetwork	0.01610299175066413	No
ENSG00000101751	POLI subnetwork	0.016197390750550867	No
ENSG00000135441	BLOC1S1 subnetwork	0.016289919785190198	No
ENSG00000130382	MLLT1 subnetwork	0.016385877787684806	No
ENSG00000131263	RLIM subnetwork	0.01641555541973061	No
MP:0008866	chromosomal instability	0.016563598793585762	No
ENSG00000094914	AAAS subnetwork	0.016599106796166174	No
GO:0019900	kinase binding	0.016718132754791712	No
ENSG00000159461	AMFR subnetwork	0.01674443946957853	No
GO:0001818	negative regulation of cytokine production	0.016746873657779358	No
MP:0005566	decreased blood urea nitrogen level	0.016755444852552273	No
MP:0004947	skin inflammation	0.016760428408714532	No
ENSG00000130522	JUND subnetwork	0.0167882968074006	No
ENSG00000131323	TRAF3 subnetwork	0.016793724583444407	No
GO:0019104	DNA N-glycosylase activity	0.016864414825820045	No
ENSG00000076984	MAP2K7 subnetwork	0.016883127082434345	No
GO:0008630	DNA damage response, signal transduction resulting in induction of apoptosis	0.01697163508451474	No
REACTOME_GLUCOSE_TRANSPORT	REACTOME_GLUCOSE_TRANSPORT	0.01715044814687945	No
GO:0002292	T cell differentiation involved in immune response	0.01716121529187384	No
ENSG00000124486	USP9X subnetwork	0.01717569223373892	No
MP:0001943	abnormal respiration	0.01728607897802343	No
ENSG00000033800	PIAS1 subnetwork	0.01731595676233901	No
ENSG00000133703	KRAS subnetwork	0.017360512830330948	No
KEGG_NOD_LIKE_RECEPTOR_SIGNALING_PATHWAY	KEGG_NOD_LIKE_RECEPTOR_SIGNALING_PATHWAY	0.01744089263274633	No
MP:0002362	abnormal spleen marginal zone morphology	0.01745438916511413	No
ENSG00000156970	BUB1B subnetwork	0.017465169854531733	No
ENSG00000185619	PCGF3 subnetwork	0.01748378630139673	No
ENSG00000097046	CDC7 subnetwork	0.017538018280335695	No
GO:0050727	regulation of inflammatory response	0.01756117781767806	No
REACTOME_SIGNALING_BY_INTERLEUKINS	REACTOME_SIGNALING_BY_INTERLEUKINS	0.01756457093218161	No
GO:0000779	condensed chromosome, centromeric region	0.01762146254570393	No
REACTOME_TRANSPORT_OF_MATURE_MRNA_DERIVED_FROM_AN_INTRONLESS_TRANSCRIPT	REACTOME_TRANSPORT_OF_MATURE_MRNA_DERIVED_FROM_AN_INTRONLESS_TRANSCRIPT	0.01769921573019727	No
MP:0002762	ectopic cerebellar granule cells	0.01771739614437277	No
GO:0016234	inclusion body	0.017734013700345535	No
ENSG00000164605	ENSG00000164605 subnetwork	0.01778684256967431	No
ENSG00000077235	GTF3C1 subnetwork	0.01783824369260208	No
ENSG00000162191	UBXN1 subnetwork	0.017889190692915443	No
MP:0005281	increased fatty acid level	0.01793120784802735	No
ENSG00000110944	IL23A subnetwork	0.01808248458808916	No
GO:0002685	regulation of leukocyte migration	0.01813456548633124	No
MP:0008111	abnormal granulocyte differentiation	0.01813692953157318	No
ENSG00000164053	ATRIP subnetwork	0.018192154491123845	No
ENSG00000215902	ENSG00000215902 subnetwork	0.018204949896633363	No
ENSG00000015153	YAF2 subnetwork	0.018212000603242087	No
GO:0003684	damaged DNA binding	0.018313815751984684	No
ENSG00000127884	ECHS1 subnetwork	0.0183180506175842	No
GO:0008026	ATP-dependent helicase activity	0.01837850921963676	No
GO:0070035	purine NTP-dependent helicase activity	0.01837850921963676	No
REACTOME_MITOTIC_PROMETAPHASE	REACTOME_MITOTIC_PROMETAPHASE	0.01848562190070808	No
ENSG00000175029	CTBP2 subnetwork	0.018528461792840088	No
MP:0001952	increased airway responsiveness	0.018539952187146897	No
GO:0051329	interphase of mitotic cell cycle	0.018550120813886007	No
ENSG00000113302	IL12B subnetwork	0.01858773245510359	No
ENSG00000142273	CBLC subnetwork	0.018758491036947576	No
MP:0002722	abnormal immune system organ morphology	0.01882115789192579	No
REACTOME_INTERACTIONS_OF_REV_WITH_HOST_CELLULAR_PROTEINS	REACTOME_INTERACTIONS_OF_REV_WITH_HOST_CELLULAR_PROTEINS	0.018916073568926224	No
REACTOME_REV:MEDIATED_NUCLEAR_EXPORT_OF_HIV:1_RNA	REACTOME_REV:MEDIATED_NUCLEAR_EXPORT_OF_HIV:1_RNA	0.019002824643896018	No
MP:0011294	renal glomerulus hypertrophy	0.01903162315387079	No
GO:0000086	G2/M transition of mitotic cell cycle	0.0190541529756724	No
REACTOME_S_PHASE	REACTOME_S_PHASE	0.019066196342970076	No
REACTOME_TRANSPORT_OF_THE_SLBP_INDEPENDENT_MATURE_MRNA	REACTOME_TRANSPORT_OF_THE_SLBP_INDEPENDENT_MATURE_MRNA	0.019118723135818125	No
REACTOME_VITAMIN_B5_PANTOTHENATE_METABOLISM	REACTOME_VITAMIN_B5_PANTOTHENATE_METABOLISM	0.019163055956651145	No
MP:0008088	abnormal T-helper 1 cell differentiation	0.019168048823674504	No
KEGG_COLORECTAL_CANCER	KEGG_COLORECTAL_CANCER	0.01918998987185759	No
MP:0000108	midline facial cleft	0.01921978343834852	No
ENSG00000109471	IL2 subnetwork	0.019276986708231574	No
ENSG00000108504	ENSG00000108504 subnetwork	0.01928344705653039	No
GO:0002262	myeloid cell homeostasis	0.019407218051267744	No
ENSG00000005339	CREBBP subnetwork	0.019475672553523678	No
MP:0002493	increased IgG level	0.01948824176983896	No
REACTOME_HOMOLOGOUS_RECOMBINATION_REPAIR_OF_REPLICATION:INDEPENDENT_DOUBLE:STRAND_BREAKS	REACTOME_HOMOLOGOUS_RECOMBINATION_REPAIR_OF_REPLICATION:INDEPENDENT_DOUBLE:STRAND_BREAKS	0.01948994051897148	No
REACTOME_HOMOLOGOUS_RECOMBINATION_REPAIR	REACTOME_HOMOLOGOUS_RECOMBINATION_REPAIR	0.01948994051897148	No
ENSG00000188620	HMX3 subnetwork	0.019539030221054465	No
ENSG00000162434	JAK1 subnetwork	0.019647398316503178	No
ENSG00000145365	TIFA subnetwork	0.019671752285137425	No
GO:0046930	pore complex	0.019730823828316806	No
GO:0035091	phosphatidylinositol binding	0.01973242685928916	No
ENSG00000169016	E2F6 subnetwork	0.019735147462398336	No
GO:0042093	T-helper cell differentiation	0.01978744276291905	No
GO:0002294	CD4-positive, alpha-beta T cell differentiation involved in immune response	0.01978744276291905	No
ENSG00000142945	KIF2C subnetwork	0.019807002222205525	No
ENSG00000185024	BRF1 subnetwork	0.019844132658324822	No
MP:0004201	fetal growth retardation	0.01984575942577944	No
ENSG00000165704	HPRT1 subnetwork	0.019945753144767223	No
REACTOME_DNA_REPLICATION	REACTOME_DNA_REPLICATION	0.019968655171788367	No
KEGG_RNA_DEGRADATION	KEGG_RNA_DEGRADATION	0.019977089459662263	No
MP:0009763	increased sensitivity to induced morbidity/mortality	0.020007520725199415	No
ENSG00000137486	ARRB1 subnetwork	0.020016471780717193	No
MP:0002432	abnormal CD4-positive T cell morphology	0.020022900491996325	No
ENSG00000107968	MAP3K8 subnetwork	0.02002352756222633	No
ENSG00000107566	ERLIN1 subnetwork	0.020072351444462653	No
ENSG00000108094	CUL2 subnetwork	0.020109593459962584	No
ENSG00000170035	UBE2E3 subnetwork	0.02015882311445841	No
KEGG_GLIOMA	KEGG_GLIOMA	0.02023346281465966	No
MP:0002458	abnormal B cell number	0.02024549666691027	No
REACTOME_HIV_LIFE_CYCLE	REACTOME_HIV_LIFE_CYCLE	0.020323270171653494	No
ENSG00000113387	SUB1 subnetwork	0.020358811165104972	No
ENSG00000099985	OSM subnetwork	0.020412555734599862	No
ENSG00000171855	IFNB1 subnetwork	0.02042394329528513	No
ENSG00000100346	CACNA1I subnetwork	0.020510556227444292	No
ENSG00000087338	GMCL1 subnetwork	0.020532671877872152	No
ENSG00000172915	NBEA subnetwork	0.020615266482368184	No
GO:2000514	regulation of CD4-positive, alpha-beta T cell activation	0.02065383488448833	No
GO:0005732	small nucleolar ribonucleoprotein complex	0.020712896660764254	No
MP:0008700	decreased interleukin-4 secretion	0.020729279464714128	No
REACTOME_INTERFERON_SIGNALING	REACTOME_INTERFERON_SIGNALING	0.020850147554538054	No
ENSG00000120437	ACAT2 subnetwork	0.020899644579268933	No
MP:0005015	increased T cell number	0.020900914004156456	No
MP:0005036	diarrhea	0.020917620300766274	No
ENSG00000107625	DDX50 subnetwork	0.02100866383713757	No
ENSG00000002822	MAD1L1 subnetwork	0.02101600165938943	No
MP:0004448	abnormal presphenoid bone morphology	0.021021011629046255	No
MP:0002161	abnormal fertility/fecundity	0.021087989620011367	No
MP:0004756	abnormal proximal convoluted tubule morphology	0.021091615989133845	No
MP:0002743	glomerulonephritis	0.021213279373705485	No
ENSG00000142611	PRDM16 subnetwork	0.021221254483439745	No
GO:0006611	protein export from nucleus	0.021227525656631	No
ENSG00000108424	KPNB1 subnetwork	0.02129708389544731	No
MP:0002123	abnormal hematopoiesis	0.02132718143041193	No
REACTOME_JNK_C:JUN_KINASES_PHOSPHORYLATION_AND__ACTIVATION_MEDIATED_BY_ACTIVATED_HUMAN_TAK1	REACTOME_JNK_C:JUN_KINASES_PHOSPHORYLATION_AND__ACTIVATION_MEDIATED_BY_ACTIVATED_HUMAN_TAK1	0.021486651105955976	No
MP:0010026	decreased liver cholesterol level	0.021495914661940767	No
ENSG00000132383	RPA1 subnetwork	0.021511443646831243	No
REACTOME_REGULATION_OF_GLUCOKINASE_BY_GLUCOKINASE_REGULATORY_PROTEIN	REACTOME_REGULATION_OF_GLUCOKINASE_BY_GLUCOKINASE_REGULATORY_PROTEIN	0.02167754967291626	No
GO:0042393	histone binding	0.02174233173926465	No
KEGG_PATHWAYS_IN_CANCER	KEGG_PATHWAYS_IN_CANCER	0.021853055670921325	No
ENSG00000130520	LSM4 subnetwork	0.021856488633987786	No
ENSG00000113569	NUP155 subnetwork	0.0218872848806968	No
MP:0008475	intermingled spleen red and white pulp	0.021937086830831187	No
ENSG00000144852	NR1I2 subnetwork	0.022009391241450106	No
MP:0001859	kidney inflammation	0.0221511308248574	No
ENSG00000173163	COMMD1 subnetwork	0.022174597700533115	No
ENSG00000073111	MCM2 subnetwork	0.022174922783382168	No
ENSG00000127948	POR subnetwork	0.02228369583811793	No
GO:0010212	response to ionizing radiation	0.022317077552212752	No
GO:0051028	mRNA transport	0.022334305192059672	No
MP:0010300	increased skin tumor incidence	0.022428956035662254	No
ENSG00000168811	IL12A subnetwork	0.022481122453194106	No
MP:0000221	decreased leukocyte cell number	0.022500575685488917	No
ENSG00000160469	BRSK1 subnetwork	0.022560198236322514	No
ENSG00000127481	UBR4 subnetwork	0.022581052379684254	No
GO:0000082	G1/S transition of mitotic cell cycle	0.022588412383539445	No
KEGG_P53_SIGNALING_PATHWAY	KEGG_P53_SIGNALING_PATHWAY	0.022761910767662038	No
GO:0005125	cytokine activity	0.022765235695856027	No
REACTOME_G2M_TRANSITION	REACTOME_G2M_TRANSITION	0.022978106567148094	No
ENSG00000159692	CTBP1 subnetwork	0.022985169530414358	No
ENSG00000096996	IL12RB1 subnetwork	0.023005289080765805	No
REACTOME_RESOLUTION_OF_AP_SITES_VIA_THE_SINGLE:NUCLEOTIDE_REPLACEMENT_PATHWAY	REACTOME_RESOLUTION_OF_AP_SITES_VIA_THE_SINGLE:NUCLEOTIDE_REPLACEMENT_PATHWAY	0.02307256074120943	No
MP:0002401	abnormal lymphopoiesis	0.02314977222224777	No
REACTOME_BASE:FREE_SUGAR:PHOSPHATE_REMOVAL_VIA_THE_SINGLE:NUCLEOTIDE_REPLACEMENT_PATHWAY	REACTOME_BASE:FREE_SUGAR:PHOSPHATE_REMOVAL_VIA_THE_SINGLE:NUCLEOTIDE_REPLACEMENT_PATHWAY	0.02315221504065739	No
GO:0006284	base-excision repair	0.023209297217437086	No
ENSG00000100302	RASD2 subnetwork	0.023237259058036943	No
MP:0004984	increased osteoclast cell number	0.02324958529291328	No
ENSG00000178607	ERN1 subnetwork	0.023282083157519496	No
ENSG00000128340	RAC2 subnetwork	0.0235035072016789	No
ENSG00000065559	MAP2K4 subnetwork	0.023513838224746043	No
MP:0009503	abnormal mammary gland duct morphology	0.023521146306580788	No
ENSG00000147082	CCNB3 subnetwork	0.023686286865690985	No
GO:0000777	condensed chromosome kinetochore	0.02376614239617531	No
ENSG00000067560	RHOA subnetwork	0.02378325108405443	No
REACTOME_MITOTIC_G2:G2M_PHASES	REACTOME_MITOTIC_G2:G2M_PHASES	0.023787105621965444	No
GO:0043491	protein kinase B signaling cascade	0.023867321240335696	No
ENSG00000123268	ATF1 subnetwork	0.023923158452508687	No
GO:0001817	regulation of cytokine production	0.023941857328319535	No
ENSG00000085415	SEH1L subnetwork	0.02395778521709836	No
ENSG00000014138	POLA2 subnetwork	0.02396152757540127	No
ENSG00000095002	MSH2 subnetwork	0.023986129998145082	No
ENSG00000100852	ARHGAP5 subnetwork	0.02399470481650303	No
ENSG00000165178	ENSG00000165178 subnetwork	0.024013703796281472	No
MP:0001272	increased metastatic potential	0.02406352911957993	No
GO:0000070	mitotic sister chromatid segregation	0.024067355273356884	No
ENSG00000115289	PCGF1 subnetwork	0.02410779993113377	No
KEGG_TGF_BETA_SIGNALING_PATHWAY	KEGG_TGF_BETA_SIGNALING_PATHWAY	0.024159322617022513	No
ENSG00000173110	HSPA6 subnetwork	0.024252278133696993	No
GO:0050658	RNA transport	0.02427100933299995	No
GO:0051236	establishment of RNA localization	0.02427100933299995	No
GO:0050657	nucleic acid transport	0.02427100933299995	No
MP:0004607	abnormal cervical atlas morphology	0.024328547243660435	No
GO:0016607	nuclear speck	0.024345432236615047	No
ENSG00000088926	F11 subnetwork	0.024364162733610813	No
ENSG00000181690	PLAG1 subnetwork	0.02443990785819386	No
MP:0000208	decreased hematocrit	0.024478595103116483	No
MP:0008567	decreased interferon-gamma secretion	0.02449912992942096	No
ENSG00000171148	TADA3 subnetwork	0.024543499610756896	No
ENSG00000125755	SYMPK subnetwork	0.02456706492665288	No
REACTOME_ACTIVATION_OF_ATR_IN_RESPONSE_TO_REPLICATION_STRESS	REACTOME_ACTIVATION_OF_ATR_IN_RESPONSE_TO_REPLICATION_STRESS	0.024596109109410794	No
GO:0031401	positive regulation of protein modification process	0.024721751057168704	No
ENSG00000075886	TUBA3D subnetwork	0.024757251098650315	No
ENSG00000198033	TUBA3C subnetwork	0.024757251098650315	No
REACTOME_NUCLEAR_IMPORT_OF_REV_PROTEIN	REACTOME_NUCLEAR_IMPORT_OF_REV_PROTEIN	0.024813942131199952	No
GO:0045429	positive regulation of nitric oxide biosynthetic process	0.024823961002012007	No
ENSG00000111752	PHC1 subnetwork	0.02492944246959789	No
REACTOME_BASE_EXCISION_REPAIR	REACTOME_BASE_EXCISION_REPAIR	0.02498003543368244	No
REACTOME_RESOLUTION_OF_ABASIC_SITES_AP_SITES	REACTOME_RESOLUTION_OF_ABASIC_SITES_AP_SITES	0.02498003543368244	No
ENSG00000107882	SUFU subnetwork	0.0250190017177239	No
ENSG00000174775	HRAS subnetwork	0.025040903426182985	No
ENSG00000134686	PHC2 subnetwork	0.025100790980876322	No
REACTOME_SIGNALING_BY_ERBB2	REACTOME_SIGNALING_BY_ERBB2	0.025145639657586198	No
ENSG00000180628	PCGF5 subnetwork	0.025187852320225836	No
REACTOME_CHROMOSOME_MAINTENANCE	REACTOME_CHROMOSOME_MAINTENANCE	0.025258074694395092	No
ENSG00000213024	NUP62 subnetwork	0.02530297846115056	No
MP:0005459	decreased percent body fat	0.025305844852843474	No
ENSG00000171150	SOCS5 subnetwork	0.025429185522821512	No
GO:0051183	vitamin transporter activity	0.02544340518721004	No
MP:0000696	abnormal Peyer's patch morphology	0.025459121277474874	No
ENSG00000105173	CCNE1 subnetwork	0.02548308399998958	No
ENSG00000168066	SF1 subnetwork	0.025593570507004455	No
GO:0019901	protein kinase binding	0.02564825200374341	No
GO:0031519	PcG protein complex	0.025843175570610416	No
ENSG00000175216	CKAP5 subnetwork	0.02589797360301154	No
REACTOME_FACTORS_INVOLVED_IN_MEGAKARYOCYTE_DEVELOPMENT_AND_PLATELET_PRODUCTION	REACTOME_FACTORS_INVOLVED_IN_MEGAKARYOCYTE_DEVELOPMENT_AND_PLATELET_PRODUCTION	0.025928278496134934	No
ENSG00000171223	JUNB subnetwork	0.025957202706524473	No
GO:0002293	alpha-beta T cell differentiation involved in immune response	0.02609627086054898	No
GO:0002287	alpha-beta T cell activation involved in immune response	0.02609627086054898	No
MP:0006379	abnormal spermatocyte morphology	0.026150600405758027	No
ENSG00000173889	PHC3 subnetwork	0.026180516432339738	No
ENSG00000111530	CAND1 subnetwork	0.026192676349609683	No
MP:0002451	abnormal macrophage physiology	0.026208498922395154	No
ENSG00000169249	ZRSR2 subnetwork	0.02620947498719815	No
ENSG00000139613	SMARCC2 subnetwork	0.026256438067334964	No
REACTOME_INNATE_IMMUNE_SYSTEM	REACTOME_INNATE_IMMUNE_SYSTEM	0.02631220026283014	No
ENSG00000101017	CD40 subnetwork	0.026425252739848484	No
ENSG00000179051	RCC2 subnetwork	0.026425620181993695	No
REACTOME_MITOTIC_M:MG1_PHASES	REACTOME_MITOTIC_M:MG1_PHASES	0.02645999179589109	No
REACTOME_EXTENSION_OF_TELOMERES	REACTOME_EXTENSION_OF_TELOMERES	0.026540608913236775	No
MP:0003702	abnormal chromosome morphology	0.026578060421159306	No
MP:0002429	abnormal blood cell morphology/development	0.026677474312828547	No
ENSG00000025800	KPNA6 subnetwork	0.026747955699596638	No
ENSG00000010030	ETV7 subnetwork	0.026871337860336117	No
GO:0016363	nuclear matrix	0.026904101946530024	No
REACTOME_SIGNALING_BY_PDGF	REACTOME_SIGNALING_BY_PDGF	0.027004340113816836	No
ENSG00000124535	WRNIP1 subnetwork	0.02705367699375989	No
ENSG00000105401	CDC37 subnetwork	0.02709171319923625	No
REACTOME_CD28_DEPENDENT_PI3KAKT_SIGNALING	REACTOME_CD28_DEPENDENT_PI3KAKT_SIGNALING	0.027109409870534885	No
REACTOME_DOUBLE:STRAND_BREAK_REPAIR	REACTOME_DOUBLE:STRAND_BREAK_REPAIR	0.027133574207234383	No
ENSG00000185338	SOCS1 subnetwork	0.027167240677115956	No
MP:0005565	increased blood urea nitrogen level	0.027280811707712835	No
MP:0000218	increased leukocyte cell number	0.02731297666212201	No
ENSG00000132669	RIN2 subnetwork	0.02737532035947147	No
ENSG00000213923	CSNK1E subnetwork	0.027463476453307278	No
ENSG00000159459	UBR1 subnetwork	0.027538124850655522	No
MP:0008565	decreased interferon-beta secretion	0.0276733701327058	No
ENSG00000175054	ATR subnetwork	0.027676131533167635	No
MP:0004510	myositis	0.027683348367580574	No
ENSG00000109971	HSPA8 subnetwork	0.027786345987350056	No
MP:0001175	abnormal lung morphology	0.027786732029301278	No
GO:0051019	mitogen-activated protein kinase binding	0.02790820533508746	No
MP:0005616	decreased susceptibility to type IV hypersensitivity reaction	0.0279089722547707	No
GO:0016278	lysine N-methyltransferase activity	0.027956897591795666	No
GO:0016279	protein-lysine N-methyltransferase activity	0.027956897591795666	No
ENSG00000138750	NUP54 subnetwork	0.028091080487943454	No
GO:0018024	histone-lysine N-methyltransferase activity	0.02812291067020814	No
MP:0002021	increased incidence of induced tumors	0.028124098009834255	No
ENSG00000132467	UTP3 subnetwork	0.028236449425257545	No
ENSG00000141564	RPTOR subnetwork	0.028249432539571427	No
ENSG00000162869	PPP1R21 subnetwork	0.02826855272340147	No
ENSG00000120156	TEK subnetwork	0.028306602637512734	No
MP:0001881	abnormal mammary gland physiology	0.028323737366806347	No
ENSG00000072401	UBE2D1 subnetwork	0.02854985923500368	No
GO:0043014	alpha-tubulin binding	0.028618295317079462	No
MP:0008553	increased circulating tumor necrosis factor level	0.02865887061944396	No
ENSG00000154767	XPC subnetwork	0.028666165456655616	No
GO:0006144	purine base metabolic process	0.02866642498844923	No
GO:0045622	regulation of T-helper cell differentiation	0.02871848947014326	No
ENSG00000119699	TGFB3 subnetwork	0.028798339875864644	No
REACTOME_TRANSPORT_OF_RIBONUCLEOPROTEINS_INTO_THE_HOST_NUCLEUS	REACTOME_TRANSPORT_OF_RIBONUCLEOPROTEINS_INTO_THE_HOST_NUCLEUS	0.02886258521680936	No
ENSG00000204390	HSPA1L subnetwork	0.02889815903262532	No
ENSG00000112576	CCND3 subnetwork	0.028909664726966867	No
GO:0006403	RNA localization	0.029036353295692322	No
ENSG00000196072	BLOC1S2 subnetwork	0.029079146355124433	No
ENSG00000113712	CSNK1A1 subnetwork	0.029112325019546307	No
GO:0006954	inflammatory response	0.029125354263815562	No
ENSG00000071462	WBSCR22 subnetwork	0.0291326064410702	No
ENSG00000007866	TEAD3 subnetwork	0.029216966823507908	No
KEGG_BASE_EXCISION_REPAIR	KEGG_BASE_EXCISION_REPAIR	0.029218933871488016	No
ENSG00000173039	RELA subnetwork	0.029220753852435943	No
MP:0002492	decreased IgE level	0.029336011872485156	No
REACTOME_HEXOSE_TRANSPORT	REACTOME_HEXOSE_TRANSPORT	0.029445653471520054	No
MP:0008133	decreased Peyer's patch number	0.029490493792176126	No
ENSG00000177169	ULK1 subnetwork	0.02950273507838534	No
REACTOME_INSULIN_RECEPTOR_SIGNALLING_CASCADE	REACTOME_INSULIN_RECEPTOR_SIGNALLING_CASCADE	0.02951748377385313	No
GO:0006275	regulation of DNA replication	0.02955867539421076	No
MP:0005666	abnormal adipose tissue physiology	0.02966327284134326	No
MP:0010875	increased bone volume	0.02973896914834394	No
GO:0006917	induction of apoptosis	0.0297512385440606	No
GO:0045428	regulation of nitric oxide biosynthetic process	0.029820973559104864	No
ENSG00000116350	SRSF4 subnetwork	0.029824635572103533	No
MP:0008476	increased spleen red pulp amount	0.029848764634798016	No
ENSG00000100395	L3MBTL2 subnetwork	0.0299447652612947	No
ENSG00000092208	GEMIN2 subnetwork	0.029945896969286075	No
MP:0000334	decreased granulocyte number	0.0299796078433847	No
ENSG00000100906	NFKBIA subnetwork	0.029999308355384252	No
ENSG00000156374	PCGF6 subnetwork	0.030014716393281723	No
ENSG00000177606	JUN subnetwork	0.030111898393291193	No
ENSG00000169251	NMD3 subnetwork	0.03020503335536389	No
MP:0003724	increased susceptibility to induced arthritis	0.030226634156048017	No
GO:0035064	methylated histone residue binding	0.03029815020895301	No
GO:0035710	CD4-positive, alpha-beta T cell activation	0.030366016924397554	No
ENSG00000204389	HSPA1A subnetwork	0.03040429895665627	No
ENSG00000212866	HSPA1B subnetwork	0.03040429895665627	No
ENSG00000215292	ENSG00000215292 subnetwork	0.03040429895665627	No
ENSG00000204388	HSPA1B subnetwork	0.03040429895665627	No
ENSG00000212860	ENSG00000212860 subnetwork	0.03040429895665627	No
MP:0011097	complete embryonic lethality before turning of embryo	0.030503208255403036	No
MP:0008499	increased IgG1 level	0.030796957032694233	No
ENSG00000175595	ERCC4 subnetwork	0.03081190389410398	No
GO:0012502	induction of programmed cell death	0.030864316772553267	No
ENSG00000125740	FOSB subnetwork	0.030906820966121303	No
GO:0000289	nuclear-transcribed mRNA poly(A) tail shortening	0.03093823617580957	No
ENSG00000163528	CHCHD4 subnetwork	0.030954268372699358	No
ENSG00000109332	UBE2D3 subnetwork	0.030984863244521845	No
GO:0043367	CD4-positive, alpha-beta T cell differentiation	0.031091472259069927	No
ENSG00000157020	SEC13 subnetwork	0.031097370530509674	No
ENSG00000100297	MCM5 subnetwork	0.031102353075533037	No
ENSG00000112312	GMNN subnetwork	0.03112114374097628	No
ENSG00000113889	KNG1 subnetwork	0.031175309641360015	No
ENSG00000120738	EGR1 subnetwork	0.03118467050949316	No
REACTOME_VPR:MEDIATED_NUCLEAR_IMPORT_OF_PICS	REACTOME_VPR:MEDIATED_NUCLEAR_IMPORT_OF_PICS	0.03133979337941223	No
ENSG00000184486	POU3F2 subnetwork	0.03134743059678562	No
ENSG00000167986	DDB1 subnetwork	0.03143372092434772	No
ENSG00000131711	MAP1B subnetwork	0.03146919993614037	No
GO:0019221	cytokine-mediated signaling pathway	0.03149815325575345	No
ENSG00000150455	TIRAP subnetwork	0.03162530066591414	No
GO:0042770	signal transduction in response to DNA damage	0.031778889904328735	No
ENSG00000087274	ADD1 subnetwork	0.031826573452734506	No
ENSG00000134453	RBM17 subnetwork	0.03186213087562972	No
MP:0002642	anisocytosis	0.031943417860179145	No
REACTOME_CYCLIN_ACDK2:ASSOCIATED_EVENTS_AT_S_PHASE_ENTRY	REACTOME_CYCLIN_ACDK2:ASSOCIATED_EVENTS_AT_S_PHASE_ENTRY	0.03201163661282402	No
GO:0000819	sister chromatid segregation	0.0320290877955345	No
ENSG00000122778	KIAA1549 subnetwork	0.032155752772958096	No
MP:0005508	abnormal skeleton morphology	0.03224932862169425	No
ENSG00000102580	DNAJC3 subnetwork	0.03225652686095587	No
GO:0033674	positive regulation of kinase activity	0.03225792689362177	No
ENSG00000137947	GTF2B subnetwork	0.03237896467238879	No
MP:0001846	increased inflammatory response	0.032385434790305916	No
MP:0011104	partial embryonic lethality before implantation	0.03253090467654263	No
ENSG00000124357	NAGK subnetwork	0.03259398068842395	No
ENSG00000172572	PDE3A subnetwork	0.03262046900220878	No
ENSG00000170142	UBE2E1 subnetwork	0.032622463056650765	No
GO:0043372	positive regulation of CD4-positive, alpha-beta T cell differentiation	0.03268589353299919	No
GO:2000516	positive regulation of CD4-positive, alpha-beta T cell activation	0.03268589353299919	No
ENSG00000206406	CSNK2B subnetwork	0.03271909584747558	No
ENSG00000206300	ENSG00000206300 subnetwork	0.03271909584747558	No
ENSG00000204435	CSNK2B subnetwork	0.03271909584747558	No
ENSG00000117020	AKT3 subnetwork	0.03277756993567365	No
ENSG00000215301	DDX3X subnetwork	0.03279370199043745	No
ENSG00000079335	CDC14A subnetwork	0.03282107818707918	No
MP:0005153	abnormal B cell proliferation	0.03304277312811916	No
GO:0046637	regulation of alpha-beta T cell differentiation	0.03304526696036919	No
GO:0051168	nuclear export	0.03316380819781328	No
GO:0034399	nuclear periphery	0.03322292656180318	No
REACTOME_EXPORT_OF_VIRAL_RIBONUCLEOPROTEINS_FROM_NUCLEUS	REACTOME_EXPORT_OF_VIRAL_RIBONUCLEOPROTEINS_FROM_NUCLEUS	0.033255025276453895	No
MP:0003057	abnormal epicardium morphology	0.033316165786455465	No
MP:0005450	abnormal energy expenditure	0.03332581765213178	No
ENSG00000136936	XPA subnetwork	0.03341016066060437	No
ENSG00000135968	GCC2 subnetwork	0.03342917017634773	No
MP:0004893	decreased adiponectin level	0.033451333203721074	No
GO:0000795	synaptonemal complex	0.033553249938912254	No
ENSG00000089234	BRAP subnetwork	0.03355870387725953	No
ENSG00000108469	RECQL5 subnetwork	0.033628937945371314	No
KEGG_TYPE_II_DIABETES_MELLITUS	KEGG_TYPE_II_DIABETES_MELLITUS	0.03366336153996268	No
MP:0008502	increased IgG3 level	0.0336678861746241	No
REACTOME_TRAF6_MEDIATED_INDUCTION_OF_TAK1_COMPLEX	REACTOME_TRAF6_MEDIATED_INDUCTION_OF_TAK1_COMPLEX	0.03368855697912939	No
REACTOME_IRAK2_MEDIATED_ACTIVATION_OF_TAK1_COMPLEX	REACTOME_IRAK2_MEDIATED_ACTIVATION_OF_TAK1_COMPLEX	0.03368855697912939	No
ENSG00000099901	RANBP1 subnetwork	0.03375422179594276	No
MP:0008560	increased tumor necrosis factor secretion	0.03376531243399383	No
MP:0005399	increased susceptibility to fungal infection	0.033909519926366025	No
MP:0004816	abnormal class switch recombination	0.03392577058360313	No
REACTOME_FGFR3C_LIGAND_BINDING_AND_ACTIVATION	REACTOME_FGFR3C_LIGAND_BINDING_AND_ACTIVATION	0.03396834645548771	No
REACTOME_FGFR3_LIGAND_BINDING_AND_ACTIVATION	REACTOME_FGFR3_LIGAND_BINDING_AND_ACTIVATION	0.03396834645548771	No
ENSG00000110107	PRPF19 subnetwork	0.03415285642982957	No
GO:0031123	RNA 3'-end processing	0.03423577842073974	No
GO:0006402	mRNA catabolic process	0.03425267731283991	No
GO:0008170	N-methyltransferase activity	0.0342958644286044	No
MP:0009541	increased thymocyte apoptosis	0.034479158963820054	No
ENSG00000205937	RNPS1 subnetwork	0.0344962103607869	No
GO:0042508	tyrosine phosphorylation of Stat1 protein	0.03458080493966321	No
MP:0002957	intestinal adenocarcinoma	0.034591369793574425	No
GO:0019207	kinase regulator activity	0.03461628000936372	No
ENSG00000167325	RRM1 subnetwork	0.03466227374027937	No
ENSG00000125870	SNRPB2 subnetwork	0.034663847418131416	No
REACTOME_PROCESSING_OF_CAPPED_INTRON:CONTAINING_PRE:MRNA	REACTOME_PROCESSING_OF_CAPPED_INTRON:CONTAINING_PRE:MRNA	0.0347250692977613	No
ENSG00000164342	TLR3 subnetwork	0.034785708073489276	No
ENSG00000061936	SFSWAP subnetwork	0.03479821005988408	No
MP:0002467	impaired neutrophil phagocytosis	0.034872136023370755	No
GO:0042054	histone methyltransferase activity	0.03488949834031571	No
MP:0002594	low mean erythrocyte cell number	0.034952920194114584	No
ENSG00000147065	MSN subnetwork	0.034957986965832154	No
MP:0001680	abnormal mesoderm development	0.03496586525852065	No
MP:0001927	abnormal estrous cycle	0.03508178371109989	No
MP:0001121	uterus hypoplasia	0.03512732987504908	No
ENSG00000147905	ZCCHC7 subnetwork	0.03516166775769972	No
ENSG00000173757	STAT5B subnetwork	0.03517931326505134	No
REACTOME_RESOLUTION_OF_AP_SITES_VIA_THE_MULTIPLE:NUCLEOTIDE_PATCH_REPLACEMENT_PATHWAY	REACTOME_RESOLUTION_OF_AP_SITES_VIA_THE_MULTIPLE:NUCLEOTIDE_PATCH_REPLACEMENT_PATHWAY	0.0351963242193206	No
REACTOME_REMOVAL_OF_DNA_PATCH_CONTAINING_ABASIC_RESIDUE	REACTOME_REMOVAL_OF_DNA_PATCH_CONTAINING_ABASIC_RESIDUE	0.0351963242193206	No
REACTOME_E2F_MEDIATED_REGULATION_OF_DNA_REPLICATION	REACTOME_E2F_MEDIATED_REGULATION_OF_DNA_REPLICATION	0.03520375542745989	No
ENSG00000159176	CSRP1 subnetwork	0.035323690868582495	No
ENSG00000012048	BRCA1 subnetwork	0.03533342671882451	No
ENSG00000106399	RPA3 subnetwork	0.03536565584385089	No
ENSG00000133818	RRAS2 subnetwork	0.03541705563515912	No
KEGG_ACUTE_MYELOID_LEUKEMIA	KEGG_ACUTE_MYELOID_LEUKEMIA	0.035426786681893384	No
GO:0005099	Ras GTPase activator activity	0.0354917448905819	No
MP:0011110	partial preweaning lethality	0.03558006741918989	No
ENSG00000196591	HDAC2 subnetwork	0.03562221314719497	No
ENSG00000122870	BICC1 subnetwork	0.035624743060300945	No
ENSG00000114127	XRN1 subnetwork	0.03562701950007224	No
ENSG00000099783	HNRNPM subnetwork	0.035691595608490334	No
MP:0008181	increased marginal zone B cell number	0.03579608504847604	No
GO:0001816	cytokine production	0.03586861065808923	No
MP:0001926	female infertility	0.03587034998379288	No
MP:0004974	decreased regulatory T cell number	0.035881316880463816	No
GO:0051301	cell division	0.035907925419252244	No
ENSG00000139687	RB1 subnetwork	0.03596966546388637	No
KEGG_PANCREATIC_CANCER	KEGG_PANCREATIC_CANCER	0.035986385412626144	No
ENSG00000170581	STAT2 subnetwork	0.0360223846533885	No
ENSG00000129691	ASH2L subnetwork	0.036064884697278955	No
ENSG00000055130	CUL1 subnetwork	0.036068829147052894	No
ENSG00000155366	RHOC subnetwork	0.03609278059113489	No
ENSG00000168884	TNIP2 subnetwork	0.03620252300937262	No
ENSG00000077157	PPP1R12B subnetwork	0.036346906192750196	No
MP:0002455	abnormal dendritic cell antigen presentation	0.03640547322656417	No
ENSG00000163828	ENSG00000163828 subnetwork	0.03643121639925363	No
ENSG00000206560	ANKRD28 subnetwork	0.03649391885529045	No
ENSG00000051180	RAD51 subnetwork	0.036499388245652235	No
REACTOME_POST:ELONGATION_PROCESSING_OF_INTRONLESS_PRE:MRNA	REACTOME_POST:ELONGATION_PROCESSING_OF_INTRONLESS_PRE:MRNA	0.03652863916953748	No
REACTOME_PROCESSING_OF_CAPPED_INTRONLESS_PRE:MRNA	REACTOME_PROCESSING_OF_CAPPED_INTRONLESS_PRE:MRNA	0.03652863916953748	No
ENSG00000142627	EPHA2 subnetwork	0.036613265455638686	No
MP:0004952	increased spleen weight	0.03661987054221838	No
GO:0006260	DNA replication	0.0366433006823771	No
ENSG00000113272	THG1L subnetwork	0.03674922427658834	No
ENSG00000211460	TSN subnetwork	0.03675296028449031	No
ENSG00000092969	TGFB2 subnetwork	0.03675920055032892	No
REACTOME_MRNA_PROCESSING	REACTOME_MRNA_PROCESSING	0.036816487910873934	No
REACTOME_DEADENYLATION_OF_MRNA	REACTOME_DEADENYLATION_OF_MRNA	0.03686770622484829	No
ENSG00000133243	BTBD2 subnetwork	0.03699199669393672	No
GO:0015931	nucleobase-containing compound transport	0.03699904757684144	No
ENSG00000115415	STAT1 subnetwork	0.037242732760413434	No
MP:0004800	decreased susceptibility to experimental autoimmune encephalomyelitis	0.037324071929924874	No
GO:0006511	ubiquitin-dependent protein catabolic process	0.037354926423655954	No
ENSG00000134250	NOTCH2 subnetwork	0.037452076505181474	No
ENSG00000132361	KIAA0664 subnetwork	0.037511773117180035	No
ENSG00000116560	SFPQ subnetwork	0.037603310886608704	No
ENSG00000078043	PIAS2 subnetwork	0.03760387849149965	No
REACTOME_CIRCADIAN_CLOCK	REACTOME_CIRCADIAN_CLOCK	0.037657610482829375	No
ENSG00000052749	RRP12 subnetwork	0.03773855684843662	No
MP:0004965	inner cell mass degeneration	0.03786624500736599	No
ENSG00000197299	BLM subnetwork	0.03791429812912709	No
MP:0008097	increased plasma cell number	0.03802972790213131	No
MP:0001130	abnormal ovarian folliculogenesis	0.038184089188524194	No
ENSG00000130222	GADD45G subnetwork	0.03821700502203792	No
ENSG00000154277	UCHL1 subnetwork	0.03821844393260902	No
ENSG00000082701	GSK3B subnetwork	0.0382805885711081	No
REACTOME_RNA_POLYMERASE_II_TRANSCRIPTION_TERMINATION	REACTOME_RNA_POLYMERASE_II_TRANSCRIPTION_TERMINATION	0.03830992772013679	No
REACTOME_CLEAVAGE_OF_GROWING_TRANSCRIPT_IN_THE_TERMINATION_REGION	REACTOME_CLEAVAGE_OF_GROWING_TRANSCRIPT_IN_THE_TERMINATION_REGION	0.03830992772013679	No
REACTOME_POST:ELONGATION_PROCESSING_OF_THE_TRANSCRIPT	REACTOME_POST:ELONGATION_PROCESSING_OF_THE_TRANSCRIPT	0.03830992772013679	No
ENSG00000115705	TPO subnetwork	0.038351242205072016	No
ENSG00000028277	POU2F2 subnetwork	0.03850124326608529	No
ENSG00000038358	EDC4 subnetwork	0.03852057135510194	No
MP:0000603	pale liver	0.038602027983863724	No
MP:0000062	increased bone mineral density	0.03874917585777624	No
ENSG00000143190	POU2F1 subnetwork	0.03874960480137737	No
ENSG00000114491	UMPS subnetwork	0.038870533627322436	No
ENSG00000100387	RBX1 subnetwork	0.03890873136506069	No
MP:0001695	abnormal gastrulation	0.038916001343056617	No
MP:0002499	chronic inflammation	0.038937379577800565	No
REACTOME_PURINE_SALVAGE	REACTOME_PURINE_SALVAGE	0.03900346784404726	No
KEGG_MAPK_SIGNALING_PATHWAY	KEGG_MAPK_SIGNALING_PATHWAY	0.03909449431661165	No
ENSG00000168310	IRF2 subnetwork	0.03922936276824091	No
GO:0033365	protein localization to organelle	0.03924991559216239	No
MP:0002442	abnormal leukocyte physiology	0.03928374144571517	No
ENSG00000120837	NFYB subnetwork	0.03933500163852009	No
ENSG00000105639	JAK3 subnetwork	0.03933612796745291	No
REACTOME_HIV_INFECTION	REACTOME_HIV_INFECTION	0.03934408627612184	No
GO:0051313	attachment of spindle microtubules to chromosome	0.03937038653262176	No
GO:0050820	positive regulation of coagulation	0.03937466187920624	No
MP:0005318	decreased triglyceride level	0.03950225356231708	No
MP:0001914	hemorrhage	0.03953228295436855	No
ENSG00000151491	EPS8 subnetwork	0.03960736226946144	No
ENSG00000140396	NCOA2 subnetwork	0.039626931247638386	No
ENSG00000114942	EEF1B2 subnetwork	0.03964763095996358	No
ENSG00000198216	CACNA1E subnetwork	0.039757712534373484	No
ENSG00000110330	BIRC2 subnetwork	0.039790012891384445	No
ENSG00000135821	GLUL subnetwork	0.039873522249843744	No
REACTOME_NEGATIVE_REGULATION_OF_FGFR_SIGNALING	REACTOME_NEGATIVE_REGULATION_OF_FGFR_SIGNALING	0.03988645556285977	No
ENSG00000088247	KHSRP subnetwork	0.03994141765670978	No
GO:0005158	insulin receptor binding	0.03997087536674192	No
GO:0016779	nucleotidyltransferase activity	0.04007375566733891	No
MP:0002875	decreased erythrocyte cell number	0.04010822741259741	No
MP:0002831	absent Peyer's patches	0.04012636069432866	No
ENSG00000100201	DDX17 subnetwork	0.04015814817685352	No
MP:0008664	decreased interleukin-12 secretion	0.04021599537494884	No
ENSG00000182511	FES subnetwork	0.040378319881045115	No
ENSG00000099804	CDC34 subnetwork	0.04038680643116837	No
MP:0004751	increased length of allograft survival	0.04055703002160105	No
MP:0001713	decreased trophoblast giant cell number	0.0406078352794376	No
MP:0011098	complete embryonic lethality during organogenesis	0.04064915198968751	No
ENSG00000186446	ZNF501 subnetwork	0.04065155796583675	No
ENSG00000131979	GCH1 subnetwork	0.04068705617927227	No
ENSG00000163602	RYBP subnetwork	0.04070281481425868	No
REACTOME_ANTIVIRAL_MECHANISM_BY_IFN:STIMULATED_GENES	REACTOME_ANTIVIRAL_MECHANISM_BY_IFN:STIMULATED_GENES	0.040781720022511465	No
REACTOME_ISG15_ANTIVIRAL_MECHANISM	REACTOME_ISG15_ANTIVIRAL_MECHANISM	0.040781720022511465	No
GO:0000087	M phase of mitotic cell cycle	0.040842398646424166	No
MP:0009335	decreased splenocyte proliferation	0.0409102043736365	No
GO:0042730	fibrinolysis	0.040916191840245336	No
MP:0008563	decreased interferon-alpha secretion	0.040927966883997385	No
ENSG00000196363	WDR5 subnetwork	0.04102638847212283	No
REACTOME_MRNA_3:END_PROCESSING	REACTOME_MRNA_3:END_PROCESSING	0.0410386588391849	No
REACTOME_POST:ELONGATION_PROCESSING_OF_INTRON:CONTAINING_PRE:MRNA	REACTOME_POST:ELONGATION_PROCESSING_OF_INTRON:CONTAINING_PRE:MRNA	0.0410386588391849	No
ENSG00000143520	FLG2 subnetwork	0.041041964253143624	No
ENSG00000204086	RPA4 subnetwork	0.04104581347296138	No
REACTOME_GAMMA:CARBOXYLATION_TRANSPORT_AND_AMINO:TERMINAL_CLEAVAGE_OF_PROTEINS	REACTOME_GAMMA:CARBOXYLATION_TRANSPORT_AND_AMINO:TERMINAL_CLEAVAGE_OF_PROTEINS	0.041171663919567565	No
GO:0052742	phosphatidylinositol kinase activity	0.0412267001987181	No
ENSG00000121741	ZMYM2 subnetwork	0.04122818032970845	No
GO:0004386	helicase activity	0.041281480417425916	No
MP:0010308	decreased tumor latency	0.04135208444793792	No
ENSG00000005007	UPF1 subnetwork	0.041455256265080405	No
ENSG00000107779	BMPR1A subnetwork	0.041639086671421806	No
GO:0008608	attachment of spindle microtubules to kinetochore	0.04169402554037024	No
ENSG00000131508	UBE2D2 subnetwork	0.04187652762665569	No
MP:0006094	increased fat cell size	0.04189696993590451	No
REACTOME_SNRNP_ASSEMBLY	REACTOME_SNRNP_ASSEMBLY	0.04191008768653578	No
REACTOME_METABOLISM_OF_NON:CODING_RNA	REACTOME_METABOLISM_OF_NON:CODING_RNA	0.04191008768653578	No
KEGG_NEUROTROPHIN_SIGNALING_PATHWAY	KEGG_NEUROTROPHIN_SIGNALING_PATHWAY	0.042021221159832665	No
ENSG00000100181	ENSG00000100181 subnetwork	0.0420526196915762	No
ENSG00000158290	CUL4B subnetwork	0.04209558280010574	No
ENSG00000180733	ENSG00000180733 subnetwork	0.04213058418260698	No
ENSG00000082175	PGR subnetwork	0.042189616609952324	No
GO:0005635	nuclear envelope	0.042196814569492785	No
ENSG00000144848	ATG3 subnetwork	0.04226509462777781	No
MP:0005088	increased acute inflammation	0.042289910265277626	No
ENSG00000204628	GNB2L1 subnetwork	0.04229313088807235	No
MP:0005095	decreased T cell proliferation	0.04230200989798724	No
ENSG00000090061	CCNK subnetwork	0.04237336117431963	No
MP:0011096	complete embryonic lethality before somite formation	0.04240006753285521	No
ENSG00000131652	THOC6 subnetwork	0.04248344937840642	No
ENSG00000196419	XRCC6 subnetwork	0.04257882545454697	No
ENSG00000047579	DTNBP1 subnetwork	0.042632855438825445	No
ENSG00000142657	PGD subnetwork	0.04272293585180672	No
REACTOME_NEPNS2_INTERACTS_WITH_THE_CELLULAR_EXPORT_MACHINERY	REACTOME_NEPNS2_INTERACTS_WITH_THE_CELLULAR_EXPORT_MACHINERY	0.04276852834691051	No
ENSG00000124789	NUP153 subnetwork	0.0428885788869227	No
GO:0004713	protein tyrosine kinase activity	0.042899890570958076	No
GO:0019941	modification-dependent protein catabolic process	0.04290281112719935	No
MP:0001847	brain inflammation	0.042942604871243864	No
ENSG00000170820	FSHR subnetwork	0.04297150931160528	No
MP:0008214	increased immature B cell number	0.043072656774355275	No
ENSG00000198176	TFDP1 subnetwork	0.04308355537386675	No
MP:0008752	abnormal tumor necrosis factor level	0.043266605114084034	No
GO:0051321	meiotic cell cycle	0.043279737714372414	No
ENSG00000184216	IRAK1 subnetwork	0.04332925583509533	No
ENSG00000105325	FZR1 subnetwork	0.04337508699287695	No
ENSG00000164683	HEY1 subnetwork	0.04359051152582916	No
GO:0046425	regulation of JAK-STAT cascade	0.043651092646683695	No
GO:0000956	nuclear-transcribed mRNA catabolic process	0.04365627474034922	No
ENSG00000136243	NUPL2 subnetwork	0.0436576076471319	No
ENSG00000176124	DLEU1 subnetwork	0.04368291692430592	No
GO:0010573	vascular endothelial growth factor production	0.043728665853041214	No
GO:0010574	regulation of vascular endothelial growth factor production	0.043728665853041214	No
ENSG00000136603	SKIL subnetwork	0.043804072554436774	No
MP:0008751	abnormal interleukin level	0.0438497631995856	No
ENSG00000126261	UBA2 subnetwork	0.043863531573799276	No
ENSG00000172845	SP3 subnetwork	0.04389183493208449	No
ENSG00000065057	NTHL1 subnetwork	0.04391664565190016	No
GO:0042510	regulation of tyrosine phosphorylation of Stat1 protein	0.04391779254851358	No
ENSG00000148308	GTF3C5 subnetwork	0.04392707951865331	No
MP:0000711	thymus cortex hypoplasia	0.04392793117415654	No
MP:0000689	abnormal spleen morphology	0.04398181720085923	No
GO:0048285	organelle fission	0.04398653669923122	No
GO:0048487	beta-tubulin binding	0.04410729448471045	No
ENSG00000187325	TAF9B subnetwork	0.044129986228902504	No
ENSG00000215760	ENSG00000215760 subnetwork	0.044129986228902504	No
MP:0008182	decreased marginal zone B cell number	0.04420005919575993	No
ENSG00000179094	PER1 subnetwork	0.04430617860911548	No
GO:0043632	modification-dependent macromolecule catabolic process	0.044327111092245595	No
MP:0000511	abnormal intestinal mucosa morphology	0.04435371773502519	No
ENSG00000101444	AHCY subnetwork	0.04436889847800743	No
GO:0018214	protein carboxylation	0.04440039165165001	No
GO:0017187	peptidyl-glutamic acid carboxylation	0.04440039165165001	No
ENSG00000138385	SSB subnetwork	0.04444145529680436	No
MP:0008189	increased transitional stage B cell number	0.04448373483712636	No
ENSG00000109320	NFKB1 subnetwork	0.0445803998402722	No
REACTOME_TRAF6_MEDIATED_NF:KB_ACTIVATION	REACTOME_TRAF6_MEDIATED_NF:KB_ACTIVATION	0.04465149507800724	No
REACTOME_INTERACTIONS_OF_VPR_WITH_HOST_CELLULAR_PROTEINS	REACTOME_INTERACTIONS_OF_VPR_WITH_HOST_CELLULAR_PROTEINS	0.04474456419773119	No
GO:0043161	proteasomal ubiquitin-dependent protein catabolic process	0.044746731982198515	No
GO:0034968	histone lysine methylation	0.04476283491648399	No
MP:0008682	decreased interleukin-17 secretion	0.044843939974478685	No
ENSG00000174718	C12orf35 subnetwork	0.044887630403089844	No
GO:0002237	response to molecule of bacterial origin	0.04506465639803576	No
ENSG00000102900	NUP93 subnetwork	0.04507130256613882	No
MP:0006319	abnormal epididymal fat pad morphology	0.04507166918442887	No
GO:0010740	positive regulation of intracellular protein kinase cascade	0.04543096709028164	No
KEGG_PROSTATE_CANCER	KEGG_PROSTATE_CANCER	0.045432538508521365	No
ENSG00000185507	IRF7 subnetwork	0.04546944456828741	No
GO:0070423	nucleotide-binding oligomerization domain containing signaling pathway	0.045530330138952586	No
GO:0002753	cytoplasmic pattern recognition receptor signaling pathway	0.045530330138952586	No
GO:0035872	nucleotide-binding domain, leucine rich repeat containing receptor signaling pathway	0.045530330138952586	No
ENSG00000059728	MXD1 subnetwork	0.045620912817911426	No
GO:0006379	mRNA cleavage	0.04570633466772128	No
ENSG00000092470	WDR76 subnetwork	0.0457351336338232	No
MP:0003949	abnormal circulating lipid level	0.045736446306188394	No
ENSG00000114867	EIF4G1 subnetwork	0.045770328177163006	No
ENSG00000172500	FIBP subnetwork	0.04579680594794194	No
MP:0004067	abnormal trabecula carnea morphology	0.04601781452991017	No
ENSG00000108654	DDX5 subnetwork	0.04605913253966882	No
ENSG00000162889	MAPKAPK2 subnetwork	0.04609490651952475	No
MP:0002497	increased IgE level	0.04612831375420893	No
ENSG00000065548	ZC3H15 subnetwork	0.04618055336467238	No
ENSG00000212645	ENSG00000212645 subnetwork	0.04632652946674632	No
ENSG00000138346	DNA2 subnetwork	0.046345559144843514	No
ENSG00000069399	BCL3 subnetwork	0.0464229235512551	No
MP:0003710	abnormal physiological neovascularization	0.04647773970530932	No
GO:0045087	innate immune response	0.04655463152670548	No
ENSG00000148773	MKI67 subnetwork	0.04661417761569876	No
ENSG00000196305	IARS subnetwork	0.04672269468374378	No
ENSG00000113013	HSPA9 subnetwork	0.04682538254328045	No
GO:0051347	positive regulation of transferase activity	0.046851403934866	No
ENSG00000139197	PEX5 subnetwork	0.0469267804395654	No
ENSG00000163517	HDAC11 subnetwork	0.04699451987054686	No
MP:0001844	autoimmune response	0.046999448587805505	No
ENSG00000030110	BAK1 subnetwork	0.04713844404266436	No
MP:0009278	abnormal bone marrow cell physiology	0.04735763807659677	No
ENSG00000116830	TTF2 subnetwork	0.04740710831093159	No
MP:0000523	cortical renal glomerulopathies	0.04757875046030736	No
ENSG00000075151	EIF4G3 subnetwork	0.04758747396770388	No
ENSG00000004700	RECQL subnetwork	0.047646398025235966	No
GO:0042506	tyrosine phosphorylation of Stat5 protein	0.04782310481135004	No
MP:0002082	postnatal lethality	0.04790413983578067	No
ENSG00000042088	TDP1 subnetwork	0.04798513815845052	No
GO:0051150	regulation of smooth muscle cell differentiation	0.047986396493426536	No
GO:0005730	nucleolus	0.04801499626614243	No
ENSG00000189162	ENSG00000189162 subnetwork	0.04804966496234165	No
ENSG00000004799	PDK4 subnetwork	0.048062589799712674	No
MP:0008496	decreased IgG2a level	0.048144223939177284	No
GO:0000236	mitotic prometaphase	0.04816220006678646	No
ENSG00000099860	GADD45B subnetwork	0.04819997922617183	No
ENSG00000173369	C1QB subnetwork	0.048246193013123224	No
GO:0034453	microtubule anchoring	0.04835736851303791	No
ENSG00000072501	SMC1A subnetwork	0.048421242130349484	No
ENSG00000135829	DHX9 subnetwork	0.04844782905526419	No
GO:0032606	type I interferon production	0.048526979622887476	No
GO:0043011	myeloid dendritic cell differentiation	0.04861679973483646	No
ENSG00000101182	PSMA7 subnetwork	0.04867931393316093	No
ENSG00000136504	KAT7 subnetwork	0.048696165114697244	No
GO:0046427	positive regulation of JAK-STAT cascade	0.04879093451141462	No
GO:0010498	proteasomal protein catabolic process	0.048808250189768664	No
MP:0004207	squamous cell carcinoma	0.048832599971455413	No
MP:0006301	abnormal mesenchyme morphology	0.048853495397005745	No
ENSG00000119041	GTF3C3 subnetwork	0.04889089463504217	No
GO:0007126	meiosis	0.048958477009076615	No
GO:0051327	M phase of meiotic cell cycle	0.048958477009076615	No
ENSG00000073009	IKBKG subnetwork	0.04896452498620764	No
ENSG00000196504	PRPF40A subnetwork	0.04899745218758035	No
MP:0002874	decreased hemoglobin content	0.04915361122300185	No
GO:0070647	protein modification by small protein conjugation or removal	0.04923478417201904	No
ENSG00000173273	TNKS subnetwork	0.04934206138339272	No
MP:0003643	spleen atrophy	0.04939708492937219	No
ENSG00000084774	CAD subnetwork	0.049414070060480764	No
ENSG00000167721	TSR1 subnetwork	0.049440072856285745	No
ENSG00000103266	STUB1 subnetwork	0.04949138626389926	No
GO:0000775	chromosome, centromeric region	0.049553731954852666	No
MP:0003077	abnormal cell cycle	0.04963292805525956	No
ENSG00000100030	MAPK1 subnetwork	0.04968255157284113	No
GO:0007067	mitosis	0.04976426412797468	No
GO:0000280	nuclear division	0.04976426412797468	No
GO:0006809	nitric oxide biosynthetic process	0.049768194558065595	No
GO:0006605	protein targeting	0.04990340349579028	No
MP:0008101	lymph node hypoplasia	0.0499094763066255	No
MP:0003717	pallor	0.04995554653356799	No
ENSG00000105810	CDK6 subnetwork	0.04996970245915078	No

## Sheet: ST5. DEPICT tissue enrichment
MeSH term	MeSH first level term	MeSH second level term	Nominal P value	False discovery rate < 5%
A15.382.490.555.567.537	Killer Cells Natural	Hemic and Immune Systems	0.007861138075598567	No
A11.118.637.555.567.569	T Lymphocytes	Cells	0.008155787297367411	No
A15.145	Blood	Hemic and Immune Systems	0.010112672170419676	No
A15.145.229	Blood Cells	Hemic and Immune Systems	0.010496910116539537	No
A11.118.637	Leukocytes	Cells	0.01149469197095697	No
A11.872.378	Hematopoietic Stem Cells	Cells	0.015254692518355487	No
A11.118.637.555.567.569.200.700	T Lymphocytes Regulatory	Cells	0.01729646782317423	No
A15.145.229.637.555.567.569.200	CD4 Positive T Lymphocytes	Hemic and Immune Systems	0.01750056332167405	No
A15.145.229.334	Erythrocytes	Hemic and Immune Systems	0.020256941465359227	No
A15.382.520	Lymphatic System	Hemic and Immune Systems	0.02063407803161387	No
A10.549	Lymphoid Tissue	Tissues	0.02063407803161387	No
A02.835.583.443.800.800	Synovial Fluid	Musculoskeletal System	0.02079314831494724	No
A11.118.637.555.567.562.440	Precursor Cells B Lymphoid	Cells	0.023276001691954862	No
A11.872.378.294	Lymphoid Progenitor Cells	Cells	0.023276001691954862	No
A15.378.316	Bone Marrow Cells	Hemic and Immune Systems	0.024923245439248527	No
A15.378	Hematopoietic System	Hemic and Immune Systems	0.024923245439248527	No
A11.443	Erythroid Cells	Cells	0.02521538807480958	No
A10.549.400	Lymph Nodes	Tissues	0.026498851744117483	No
A11.627	Myeloid Cells	Cells	0.028141526511691328	No
A15.145.229.637.555	Leukocytes Mononuclear	Hemic and Immune Systems	0.031612757980213374	No
A11.118.637.415	Granulocytes	Cells	0.03175648270664184	No
A15.382.680	Phagocytes	Hemic and Immune Systems	0.034754164092390044	No
A15.382.490.555.567.622	Lymphocytes Null	Hemic and Immune Systems	0.03542794542747998	No
A15.382.490.315.583	Neutrophils	Hemic and Immune Systems	0.03592175876494835	No
A11.627.635	Myeloid Progenitor Cells	Cells	0.04246613564683204	No
A15.382	Immune System	Hemic and Immune Systems	0.04477582668131405	No
A15.382.520.604.700	Spleen	Hemic and Immune Systems	0.0491835855029362	No

## Sheet: ST6. Replication LADACTRL
Initial GWAS (LADACTRL)											With HUNT & GoDARTS Replication
chromosome	position	SNP	reference_allele	other_allele	eaf	OR	p-value	n_samples	effects	gene	rs_number	OR	OR_95L	OR_95U	p-value	n_studies	n_samples	effects
10	6178614	rs1983890	C	T	0.642	1.225	2.69E-07	8152	---	PFKFB3	10:6178614	1.23024	1.14396	1.32301	3.02e-08	5	10590	+++++
6	90958231	rs11755527	G	C	0.443857	1.20085	6.96E-07	8152	+++	BACH2	6:90958231	1.2039	1.12502	1.28831	1.02e-07	5	10589	+++++
14	69473004	rs446091	G	A	0.531716	1.20884	4.97E-07	8151	+++	ACTN1	14:69473004	1.169	1.09071	1.2529	1.19e-05	5	10589	+++++
8	119886923	rs2055101	T	C	0.516812	1.19981	1.19E-06	8151	+++	TNFRSF11B	8:119886923	1.15026	1.07387	1.23208	7.47e-05	5	10589	++++-
19	18637610	rs4808814	T	C	0.315038	0.828896	3.33E-06	8151	---	ELL	19:18637610	0.845985	0.785692	0.910906	1.09e-05	5	10590	-----
2	43806382	rs11888640	T	C	0.518478	0.84385	6.32E-06	8151	---	THADA	2:43806382	0.845073	0.788925	0.905218	1.94e-06	5	10589	----+
5	98450813	rs10900893	A	G	0.517587	0.843639	4.99E-06	8151	---	LOC100289230	5:98450813	0.857183	0.800631	0.917729	1.13e-05	5	10589	----+
14	101306045	rs941576	G	A	0.445121	0.84641	9.51E-06	8151	---	DLK1	14:101306045	0.870872	0.812691	0.933219	1.01E-04	5	10589	----+
18	12687969	rs113916314	G	A	0.082445	1.38843	1.14E-06	8151	+++	SPIRE1	18:12687969	1.293348	1.142584	1.464005	5.45E-05	5	10589	+++--
7	156016226	rs1922086	C	T	0.565885	0.840412	8.19E-06	8152	---	LOC285889	7:156016226	0.853060	0.794173	0.916313	1.56E-05	5	10590	-----
6	168111238	rs619330	A	G	0.522905	1.19612	8.98E-06	8151	+++	LOC441178	6:168111238	1.180332	1.096366	1.270729	1.25E-05	5	10589	++++-
6	42075522	rs9349218	A	G	0.182417	1.23535	7.93E-06	8152	+++	C6orf132	6:42075522	1.177276	1.078969	1.284540	2.73E-04	5	10590	+++--
7	12077764	rs7800617	G	A	0.588141	1.20429	5.03E-06	8151	+++	TMEM106B	7:12077764	1.154042	1.071515	1.242925	1.74E-04	5	10589	+++--

## Sheet: ST7. Chr10p15 LD
Genome-wide significant signals associated with T1D from various publications (and top LADA signal) - pairwise r2
	rs61839660	rs10795791	rs7090530	rs12251307	rs41295121	rs1983890- LADA snp	rs11258747	Reference	Position (b37)	HRC coordinates
rs61839660		0.052	0.124	0.543	0.002	0.096	0	Onengut	6094697	10:6094697_C_T
rs10795791			0.423	0.02	0.029	0.141	0	Onengut	6108340	10:6108340_A_G
rs7090530				0.094	0.069	0.466	0.064	Bradfield	6110875	10:6110875_C_A
rs12251307					0.003	0.075	0.008	Barrett	6123495	10:6123495_C_T
rs41295121						0.054	0.011	Onengut	6129643	not found
rs1983890- LADA snp							0.025	NA	6178614	10:6178614_C_T
rs11258747								Barrett	6472891	10:6472891_G_T

## Sheet: ST8. DEPICT gene prioritization
Locus	Nr of genes in locus	Chromosome and position	Ensembl Gene ID	Gene symbol	Nominal P value	Gene closest to lead SNP	Gene bio-type	Top cis eQTL SNP (Westra et al. Nature Genetics 2014)	False discovery rate < 5%
rs4808814	1	chr19:18553475-18632937	ENSG00000105656	ELL	0.003215425617430626	true	protein_coding	rs10164319	No
rs10858008;rs2476601	7	chr1:113933371-114456708	ENSG00000118655	DCLRE1B	0.00939376408953795	false	protein_coding+processed_transcript	rs878129	No
rs10858008;rs2476601	7	chr1:113933371-114456708	ENSG00000134242	PTPN22	0.028557507670058206	true	protein_coding+retained_intron+nonsense_mediated_decay+processed_transcript	rs7555634;rs1217397	No
rs11888640	1	chr2:43393800-43823185	ENSG00000115970	THADA	0.05308144972490396	true	protein_coding+nonsense_mediated_decay+processed_transcript+retained_intron	-	No
rs313568	2	chr4:25121627-25280714	ENSG00000109618	SEPSECS	0.055679520575492615	false	protein_coding+nonsense_mediated_decay+processed_transcript+retained_intron	rs4697567	No
rs2926016	1	chr11:81590893-82429124	ENSG00000245832	-	0.15326679127361548	true	lincRNA	-	No
rs10900893	1	chr5:98190908-98262240	ENSG00000153922	CHD1	0.16502703279341913	true	retained_intron+protein_coding+nonsense_mediated_decay+processed_transcript	rs16779	No
rs1983890	1	chr10:6186881-6277495	ENSG00000170525	PFKFB3	0.24281180506891342	true	protein_coding+nonsense_mediated_decay+processed_transcript	-	No
rs10858008;rs2476601	7	chr1:113933371-114456708	ENSG00000081019	RSBN1	0.2671599670506913	false	protein_coding+nonsense_mediated_decay+processed_transcript	rs2185827	No
rs11755527	1	chr6:90636248-91006627	ENSG00000112182	BACH2	0.26769470582425847	true	protein_coding+processed_transcript	rs10944479;rs10944479	No
rs10858008;rs2476601	7	chr1:113933371-114456708	ENSG00000134262	AP4B1	0.27809087522555	false	protein_coding+processed_transcript	rs1217397	No
rs10858008;rs2476601	7	chr1:113933371-114456708	ENSG00000081026	MAGI3	0.4520931935618142	true	protein_coding+processed_transcript	-	No
rs2055101	2	chr8:119935796-120118821	ENSG00000184374	COLEC10	0.46432158181229527	false	processed_transcript+protein_coding	rs4295687	No
rs313568	2	chr4:25121627-25280714	ENSG00000038210	PI4K2B	0.6484032292165889	true	processed_transcript+protein_coding	rs12498160	No
rs10858008;rs2476601	7	chr1:113933371-114456708	ENSG00000116793	PHTF1	0.6503839197915867	false	processed_transcript+protein_coding	rs4838993	No
rs10858008;rs2476601	7	chr1:113933371-114456708	ENSG00000188761	BCL2L15	0.6930553739267017	false	retained_intron+protein_coding+processed_transcript	-	No
rs1922086	1	chr7:156230483-156238282	ENSG00000233878	-	0.8492889520654834	true	lincRNA	-	No
rs941576	3	chr14:101245747-101327368	ENSG00000211574	MIR770	0.8758092444558145	false	miRNA	-	No
rs941576	3	chr14:101245747-101327368	ENSG00000252701	-	0.884709833864673	false	snoRNA	-	No
rs941576	3	chr14:101245747-101327368	ENSG00000214548	MEG3	0.8934307212376528	true	lincRNA	-	No
rs2055101	2	chr8:119935796-120118821	ENSG00000164761	TNFRSF11B	0.932703896893819	true	protein_coding+retained_intron+nonsense_mediated_decay	rs1389541	No
rs4409356	1	chr7:54610018-54638773	ENSG00000170419	VSTM2A	0.9581713519638239	true	protein_coding+retained_intron+processed_transcript	-	No

## Sheet: ST9. T1D loci in LADACTRL
Loci surpassing Bonferroni-significance threshold (P < 0.0008) are in bold; nominally significant are highlighted. All loci are given for T1D risk-increasing allele. Power calculations using CaTS calculator. (http://csg.sph.umich.edu/abecasis/cats/) Number of cases: 2700, number of controls: 5500. T1D prevalence of 0.0036. Published effect size are derived from odds ratios used in Mishra et al 20…															0.000757576
																									Power to detect signal
SNP	chr:pos	reference_allele	other_allele	eaf	OR	OR_se	OR_95L	OR_95U	z	P	_-log10_p-value	q_statistic	q_p-value	i2	n_studies	n_samples	effects	LOCUS	AverageCall	Rsq	Genotyped	Risk Allele	Disease risk allele frequency in LADA cohort	Published effect size	α = 0.00000005	α = 0.05
rs7454108	6:32681483	C	T	0.169470	2.74391	0.122793	2.50323	3.00772	21.5512	1.84e-101	100.735993	6.108287	0.106459	0.508864	4	9415	++++	HLA_DQB1	0.99853	0.99262	Imputed	--	--	--	--	--
rs9272346	6:32604372	A	G	0.575607	1.95135	0.074214	1.80589	2.10852	16.9141	3.31e-63	62.480680	6.941346	0.073791	0.567807	4	9415	++++	MHC	0.91774	0.75788	Imputed	A	0.575607	5.58	1	1
rs2187668	6:32605884	T	C	0.152301	2.47918	0.140648	2.20351	2.78933	15.0966	1.02e-50	49.989324	5.950244	0.114056	0.495819	4	9414	++++	HLA_DRB1	0.91827	0.57656	Imputed	--	--	--	--	--
rs3129889	6:32413545	A	G	0.880142	2.43953	0.146009	2.15335	2.76374	14.0082	6.57e-44	43.182725	14.168376	8.38E-04	0.858841	3	8581	+++?	HLA_DRB1_15	1	1	Genotyped	A	0.880142	14.88	1	1
rs6679677	1:114303808	A	C	0.120973	1.66681	0.085166	1.49989	1.85232	9.48972	4.82e-21	20.316573	3.365023	0.338695	0.108476	4	9414	++++	PTPN22, PHTF1	0.99984	0.99895	Genotyped	A	0.120973	1.82	1	1
rs689	11:2182224	T	A	0.706644	1.45907	0.058107	1.34518	1.5826	9.11125	1.6e-19	18.794667	1.974031	0.577814	0.000000	4	9414	++++	INS,IGF2, INS-IGF2,TH	0.98004	0.92132	Imputed	T	0.706644	2.39	1	1
rs17696736	12:112486818	G	A	0.452657	1.21635	0.042156	1.13372	1.30499	5.45685	6.22e-08	7.206341	1.090945	0.779260	0.000000	4	9415	++++	SH2B3,NAA25, CUX2, FAM109A, ATXN2, BRAP, ACAD10, RP11-162P23.2 (ENSG00000257767), ALDH2, MAPKAPK5, TMEM116, ERP29, TRAFD1, HECTD4, RPL6, PTPN11, RPH3A	0.75768	0.35748	Imputed	G	0.452657	1.34	1	1
rs11755527	6:90958231	G	C	0.442840	1.20082	0.041275	1.11992	1.28757	5.14283	3.38e-07	6.471365	0.074028	0.994761	0.000000	4	9414	++++	BACH2	0.97968	0.93419	Imputed	G	0.44284	1.13	0.038	0.957
rs597325	6:91002494	G	A	0.579979	1.19491	0.04221	1.11217	1.28379	4.8642	1.4e-06	5.853414	4.290637	0.231743	0.300803	4	9415	++++	BACH2	0.97456	0.90213	Imputed	G	0.579979	1.19	0.386	0.999
rs72928038	6:90976768	A	G	0.181547	1.23142	0.055809	1.12203	1.35147	4.38601	1.36e-05	4.867429	5.002739	0.171597	0.400328	4	9414	++++	BACH2	0.94088	0.70034	Imputed	A	0.181547	1.2	0.127	0.991
rs229541	22:37591318	A	G	0.421918	1.16528	0.040822	1.08527	1.25119	4.21462	2.9e-05	4.536879	1.945014	0.583897	0.000000	4	9414	+++-	IL2RB, C1QTNF6, SSTR3, RAC2	0.99966	0.9989	Genotyped	A	0.421918	1.12	0.02	0.923
rs941576	14:101306045	A	G	0.448258	1.1625	0.030173	1.08258	1.24832	-4.14337	3.95e-05	4.402991	1.727052	0.630936	0.000000	4	9414	----	DLK1	0.92384	0.79071	Imputed	A	0.448258	1.14	0.066	0.975
rs11571316	2:204731089	G	A	0.379319	1.1613	0.030658	1.08026	1.24842	-4.05186	5.83e-05	4.234074	1.589401	0.661795	0.000000	4	9415	----	CTLA4, ICOS	0.98871	0.95988	Imputed	G	0.379319	1.22	0.664	1
rs7090530	10:6110875	A	C	0.592719	1.1565	0.041907	1.07437	1.24492	3.86839	0.000124	3.905674	2.488712	0.477334	0.000000	4	9414	++++	IL2RA, RBM17, PFKFB3	0.99873	0.99583	Imputed	A	0.592719	1.22	0.663	1
rs72727394	15:38847022	T	C	0.197829	1.17789	0.050204	1.07949	1.28526	3.67852	0.000263	3.580193	1.221918	0.747752	0.000000	4	9415	++++	RASGRP1, C15orf53	0.99107	0.95893	Imputed	T	0.197829	1.15	0.021	0.928
rs61839660	10:6094697	C	T	0.082556	1.27307	0.049011	1.11738	1.45045	-3.62772	0.000319	3.495588	1.408053	0.703648	0.000000	4	9414	----	IL2RA, RBM17, PFKFB3	0.99758	0.97184	Imputed	C	0.082556	1.62	0.999	1
rs4763879	12:9910164	A	G	0.384760	1.14106	0.040553	1.06158	1.2265	3.58218	0.00038	3.420624	1.063455	0.785903	0.000000	4	9415	++++	CD69, KLRB1, CLEC2D, CLECL1	0.98932	0.96576	Imputed	A	0.38476	1.09	-	0.717
rs9653442	2:100825367	C	T	0.524612	1.124	0.030576	1.04829	1.20518	-3.28551	0.001115	2.952674	1.144757	0.766282	0.000000	4	9414	----	AFF3	0.99985	0.99954	Genotyped	C	0.524612	1.11	0.011	0.882
rs10492166	12:9885999	G	A	0.477590	1.10373	0.031515	1.02848	1.18449	-2.7396	0.006557	2.183270	2.868533	0.412342	0.000000	4	9414	----	CD69	0.99321	0.97774	Imputed	G	0.47759	1.15	0.109	0.988
rs12708716	16:11179873	A	G	0.343841	1.10891	0.03307	1.02921	1.19479	-2.71653	0.007025	2.153348	3.698167	0.295955	0.188787	4	9414	---+	CLEC16A,CIITA, DEXI, RMI2, SOCS1, TNP2, PRM3, PRM2, PRM1, CTD-3088G3.8	0.99988	0.99966	Genotyped	A	0.343841	1.23	0.709	1
rs10795791	10:6108340	G	A	0.424748	1.10217	0.038595	1.02652	1.18339	2.68144	0.007794	2.108231	0.159886	0.983789	0.000000	4	9415	++++	IL2RA, RBM17	0.99892	0.9963	Imputed	G	0.424748	1.16	0.157	0.993
rs1738074	6:159465977	C	T	0.582475	1.10001	0.038798	1.02396	1.1817	2.60787	0.009656	2.015201	2.289246	0.514584	0.000000	4	9415	++++	RSPH3, TAGAP	0.9996	0.99861	Genotyped	C	0.582475	1.09	-	0.727
rs1615504	18:67526644	T	C	0.512894	1.09633	0.031681	1.0217	1.17642	-2.55673	0.011174	1.951776	1.282680	0.733250	0.000000	4	9414	----	DOK6, CD226	0.99321	0.97574	Imputed	T	0.512894	1.13	0.039	0.958
rs12453507	17:38053207	G	C	0.507382	0.924188	0.031928	0.861609	0.991311	-2.20395	0.028717	1.541857	1.214906	0.749431	0.000000	4	9414	----	FBXL20, MED1, CDK12, NEUROD2, PPP1R1B, STARD3, TCAP, PNMT, PGAP3, ERBB2, MIEN1, GRB7, IKZF3, ZPBP2, GSDMB, ORMDL3, LRRC3C, GSDMA, PSMD3, CSF3, MED24, THRA	0.9981	0.99351	Imputed	G	0.507382	1.11	0.011	0.883
rs9585056	13:100081766	C	T	0.709638	1.09054	0.036972	1.00435	1.18411	-2.06345	0.040561	1.391894	3.083066	0.378995	0.026943	4	9415	----	UBAC2, GPR18, GPR183, TM9SF2	0.98709	0.9486	Imputed	C	0.709638	1.12	-	0.869
rs2542151	18:12779947	G	T	0.770972	1.09933	0.040148	1.00423	1.20343	-2.05145	0.041742	1.379424	4.995025	0.172162	0.399402	4	9414	-+--	PTPN2	0.9999	0.9994	Genotyped	G	0.770972	1.3	0.853	1
rs1990760	2:163124051	T	C	0.607695	1.07838	0.038636	1.00266	1.15983	2.03139	0.04378	1.358720	4.845480	0.183468	0.380866	4	9415	+++-	GCG, FAP, IFIH1, GCA, KCNH7	0.80904	0.45619	Imputed	T	0.607695	1.15	0.088	0.984
rs7804356	7:26891665	T	C	0.224312	1.0911	0.037759	1.00299	1.18694	-2.0295	0.043977	1.356775	3.102239	0.376129	0.032956	4	9414	---+	SKAP2, C7orf71, HOXA1, HOXA2, HOXA3, HOXA4, HOXA5, HOXA6, HOXA7, HOXA9	0.99991	0.99953	Genotyped	T	0.224312	1.14	0.017	0.975
rs10509540	10:90023033	T	C	0.291097	1.07243	0.035426	0.992575	1.15871	-1.77121	0.078735	1.103830	1.905799	0.592187	0.000000	4	9415	---+	RNLS	0.99981	0.99921	Genotyped	T	0.291097	1.14	0.034	0.952
rs3024493	1:206943968	C	A	0.156166	1.08847	0.043114	0.98835	1.19872	-1.72197	0.087412	1.058427	2.247074	0.522736	0.000000	4	9414	---+	MAPKAPK2, IL10, IL19, IL20	0.99987	0.99892	Genotyped	C	0.156166	1.22	0.16	0.994
rs11170466	12:53585859	T	C	0.065599	1.1267	0.074931	0.979839	1.29558	1.67418	0.096555	1.015224	0.870052	0.832648	0.000000	4	9414	++++	ITGB7	0.99095	0.8833	Imputed	T	0.065599	1.19	-	0.784
rs911263	14:68753593	T	C	0.670627	1.06342	0.040325	0.984382	1.1488	1.5605	0.121385	0.915835	5.097644	0.164785	0.411493	4	9414	+++-	RAD51B, ZFP36L1	0.98925	0.95823	Imputed	T	0.670627	1.12	0.012	0.892
rs6476839	9:4290823	T	A	0.413986	1.0542	0.037025	0.98163	1.13213	1.45048	0.149926	0.824123	1.493416	0.683791	0.000000	4	9415	++++	GLIS3	0.99914	0.9973	Imputed	T	0.413986	1.12	0.019	0.922
rs12908309	15:38928677	G	A	0.239460	1.0633	0.038213	0.978624	1.15531	-1.44967	0.150153	0.823467	3.234018	0.356932	0.072361	4	9414	--++	RASGRP1	0.97209	0.88462	Imputed	G	0.23946	1.19	0.184	0.995
rs193778	16:11351211	G	A	0.249552	1.05912	0.041821	0.97715	1.14797	1.39758	0.165352	0.781589	2.559211	0.464685	0.000000	4	9415	+++-	CLEC16A,CIITA, DEXI, RMI2, SOCS1, TNP2, PRM3, PRM2, PRM1, CTD-3088G3.8	0.9994	0.99743	Imputed	G	0.249552	1.14	0.023	0.934
rs11203203	21:43836186	A	G	0.376986	1.05136	0.037557	0.977749	1.13051	1.35241	0.179448	0.746063	4.700761	0.195067	0.361805	4	9414	++-+	UBASH3A	0.99479	0.98288	Imputed	A	0.376986	1.14	0.055	0.971
rs5753037	22:30581722	T	C	0.379747	1.05076	0.037287	0.977681	1.12931	1.34631	0.181418	0.741319	3.821428	0.281403	0.214953	4	9414	+++-	NF2, CABP7, ZMAT5, UQCR10, ASCC2, MTMR3, HORMAD2, LIF, OSM	0.99992	0.99976	Genotyped	T	0.379747	1.11	-	0.867
rs1456988	14:98488007	G	T	0.680563	1.05306	0.036169	0.974447	1.13802	-1.30609	0.19481	0.710389	3.982604	0.263349	0.246724	4	9415	+---	C14orf64	0.99992	0.99972	Genotyped	G	0.680563	1.12	0.011	0.887
rs11258747	10:6472891	T	G	0.231811	1.05356	0.043186	0.968913	1.1456	1.22096	0.225521	0.646814	1.127173	0.770519	0.000000	4	9415	++-+	PRKCQ	0.99127	0.96124	Imputed	G	0.768189	1.45	1	1
rs602662	19:49206985	G	A	0.487704	0.960454	0.035732	0.895849	1.02972	1.1357	0.259598	0.585698	5.381248	0.145916	0.442508	4	9415	+-+-	FUT2,SULT2B1, FAM83E, SPACA4, RPL18, SPHK2, DBP, CA11, NTN5, MAMSTR, RASIP1, IZUMO1, FUT1, FGF21	0.99696	0.99064	Imputed	A	0.512296	1.12	0.021	0.928
rs2281808	20:1610551	C	T	0.634102	1.0426	0.038124	0.967875	1.12309	1.09942	0.275131	0.560460	3.133373	0.371515	0.042565	4	9414	++--	SIRPD, RP4-576H24.4 (ENSG00000260861), SIRPB1, SIRPG	0.99956	0.99848	Genotyped	C	0.634102	1.11	-	0.858
rs10877012	12:58162085	G	T	0.338296	0.963452	0.038174	0.894	1.0383	0.97539	0.332948	0.477624	0.618016	0.892296	0.000000	4	9415	++++	CYP27B1	0.99484	0.98045	Imputed	G	0.338296	1.22	0.614	1
rs2611215	4:166574267	A	G	0.770291	1.04521	0.04318	0.952748	1.14664	-0.935672	0.353012	0.452210	0.502274	0.918391	0.000000	4	9414	---+	TMEM192, KLHL2, MSMO1, CPE, TLL1	0.98509	0.92241	Imputed	A	0.770291	1.19	0.135	0.992
rs11954020	5:35883251	G	C	0.406459	1.03364	0.036576	0.961949	1.11067	0.902172	0.370518	0.431191	10.783156	0.012958	0.721788	4	9414	++--	IL7R	0.99783	0.99293	Imputed	G	0.406459	1.11	-	0.875
rs402072	19:47219122	T	C	0.152507	1.04419	0.045638	0.94666	1.15177	-0.86434	0.390923	0.407909	3.173390	0.365657	0.054639	4	9414	+-+-	DACT3, PRKD2, STRN4, FKRP, SLC1A5	0.9948	0.9667	Imputed	T	0.152507	1.15	-	0.865
rs1538171	6:126752884	G	C	0.466482	1.03123	0.035693	0.961276	1.10629	0.858131	0.394335	0.404134	3.559382	0.313142	0.157157	4	9414	+++-	CENPW	0.99957	0.99873	Imputed	G	0.466482	1.12	0.021	0.928
rs10272724	7:50477213	T	C	0.268434	0.967761	0.039887	0.894541	1.04697	0.816397	0.417739	0.379095	2.767000	0.428961	0.000000	4	9414	+-+-	IKZF1, FIGNL1, DDC, GRB10	0.99855	0.99409	Imputed	T	0.268434	1.15	0.047	0.966
rs113010081	3:46457412	T	C	0.119859	1.04416	0.050692	0.935833	1.16502	-0.773232	0.442786	0.353806	0.857629	0.835639	0.000000	4	9414	--+-	CCR5	0.99242	0.9348	Imputed	T	0.119859	1.19	0.025	0.937
rs7928968	11:2050299	T	A	0.245291	1.03331	0.042697	0.949626	1.12437	0.760481	0.450346	0.346453	4.883435	0.180534	0.385678	4	9414	-+++	INS,IGF2, INS-IGF2,TH	0.93222	0.72532	Imputed	T	0.245291	1.25	0.676	1
rs3825932	15:79235446	C	T	0.646260	0.971629	0.035831	0.9014	1.04733	-0.75188	0.455487	0.341524	0.631140	0.889268	0.000000	4	9414	----	CHRNB4, ADAMTS7, MORF4L1, CTSH, RASGRF1	0.89547	0.6714	Imputed	T	0.35374	1.16	0.128	0.991
rs2304256	19:10475652	C	A	0.279539	1.0288	0.037465	0.951075	1.11287	-0.708382	0.481983	0.316968	2.145275	0.542808	0.000000	4	9414	+--+	ICAM1, ICAM4, ICAM5, ZGLP1, FDX1L, FDX1L, CTD-2369P2.12, RAVER1, ICAM3, TYK2, CDC37, PDE4A, KEAP1, S1PR5	0.99979	0.99914	Genotyped	C	0.279539	1.16	0.083	0.983
rs10517086	4:26085511	A	G	0.292960	1.02718	0.038699	0.951333	1.10908	0.685265	0.496398	0.304170	0.720095	0.868468	0.000000	4	9414	+-+-	SLC34A2, SEL1L3, SMIM20, RBPJ, CCKAR, TBC1D19	0.99929	0.99718	Genotyped	A	0.29296	1.09	-	0.661
rs601338	19:49206674	G	A	0.459579	0.978106	0.035155	0.912187	1.04879	0.621855	0.537088	0.269954	5.593593	0.133147	0.463672	4	9414	+-+-	FUT2,SULT2B1, FAM83E, SPACA4, RPL18, SPHK2, DBP, CA11, NTN5, MAMSTR, RASIP1, IZUMO1, FUT1, FGF21	0.99856	0.99513	Imputed	A	0.540421	1.34	1	1
rs9924471	16:28591530	A	G	0.152720	1.03049	0.048771	0.934903	1.13586	0.604758	0.548339	0.260951	1.205612	0.751659	0.000000	4	9415	++-+	SBK1, NPIPB6, EIF3CL, NPIPB7, CLN3, CLN3, APOBR, IL27, NUPR1, CCDC101, SULT1A2, SULT1A1, NPIPB8, EIF3C, NPIPB9, ATXN2L, TUFM, SH2B1, ATP2A1, RABEP2, CD19, NFATC2IP, SPNS1, LAT	0.93812	0.66902	Imputed	A	0.15272	1.25	0.316	0.999
rs6691977	1:200814959	C	T	0.205768	0.974261	0.04143	0.893058	1.06285	-0.587261	0.559972	0.251833	3.536734	0.316029	0.151760	4	9414	-+++	KIF14, DDX59, CAMSAP2, GPR25, C1orf106	0.99549	0.98006	Imputed	C	0.205768	1.13	-	0.86
rs924043	6:170379025	C	T	0.802525	0.973924	0.048914	0.878052	1.08026	-0.499743	0.619885	0.207689	1.749586	0.625967	0.000000	4	9414	-++-	WDR27, C6orf120, PHF10, TCTE3, ERMARD, DLL1, FAM120B, PSMB1, TBP, PDCD2	0.98357	0.91667	Imputed	C	0.802525	1.19	0.09	0.985
rs478222	2:25301755	A	T	0.419562	1.01802	0.034621	0.947697	1.09356	-0.48904	0.6274	0.202455	3.244553	0.355435	0.075373	4	9414	-+-+	DNMT3A,CENPO, ADCY3, DNAJC27, EFR3B, POMC	0.99352	0.97825	Imputed	A	0.419562	1.15	0.102	98.7
rs722988	10:33426147	C	T	0.375996	1.01426	0.03654	0.942645	1.09132	0.379059	0.706743	0.150738	2.264121	0.519429	0.000000	4	9415	+--+	ITGB1, NRP1	0.99487	0.98405	Imputed	C	0.375996	1.11	-	0.867
rs4849135	2:111615079	G	T	0.672582	1.01395	0.038612	0.938272	1.09574	0.350106	0.728215	0.137740	1.532717	0.674740	0.000000	4	9414	-+++	ACOXL,LINC00116, LIMS3, LIMS3L, RGPD6, BUB1, ACOXL	0.99923	0.9972	Imputed	G	0.672582	1.12	0.012	0.892
rs6827756	4:123184411	T	C	0.599617	0.987234	0.036126	0.918224	1.06143	0.347511	0.730151	0.136588	4.383932	0.222880	0.315683	4	9414	+-++	KIAA1109, ADAD1, IL2, IL21	0.99791	0.99263	Imputed	T	0.599617	1.13	0.032	0.95
rs6920220	6:138006504	A	G	0.218906	1.01357	0.042455	0.93036	1.10423	0.308443	0.759487	0.119480	3.607321	0.307107	0.168358	4	9415	-++-	TNFAIP3	0.99995	0.99971	Genotyped	A	0.218906	1.12	-	0.817
rs694739	11:64097233	A	G	0.377703	1.01141	0.035184	0.940865	1.08724	-0.307487	0.76021	0.119066	4.410581	0.220406	0.319817	4	9414	+---	BAD,MACROD1, FLRT1, STIP1, FERMT3, TRPT1, NUDT22, DNAJC4, VEGFB, FKBP2, PPP1R14B, PLCB3, GPR137, KCNK4, TEX40, ESRRA, TRMT112, PRDX5, CCDC88B, RPS6KA4	0.99991	0.99968	Genotyped	A	0.377703	1.05	-	0.3
rs12148472	15:79231478	T	C	0.123955	1.01401	0.051231	0.910765	1.12896	-0.253979	0.80096	0.096389	2.996797	0.392119	0.000000	4	9415	-++-	CHRNB4, ADAMTS7, MORF4L1, CTSH, RASGRF1	0.92571	0.46373	Imputed	T	0.123955	1.2	0.037	0.955
rs1465788	14:69263599	C	T	0.689170	1.01018	0.039297	0.933158	1.09356	0.250332	0.803759	0.094874	1.437956	0.696662	0.000000	4	9414	-+++	RAD51B, ZFP36L1	0.99989	0.99962	Genotyped	C	0.68917	1.16	0.09	0.984
rs4948088	7:51027194	C	A	0.843197	1.0211	0.088094	0.848435	1.2289	0.220916	0.826422	0.082798	1.021120	0.600159	0.000000	3	7047	+?-+	COBL	0.99991	0.99799	Genotyped	C	0.843197	1.3	0.555	1
rs7221109	17:38770286	C	T	0.614819	1.0015	0.036462	0.930036	1.07846	0.039741	0.96852	0.013891	1.662238	0.645361	0.000000	4	9414	+-++	CCR7, SMARCE1, KRT222, KRT222, KRT24	0.99962	0.99848	Genotyped	C	0.614819	1.05	-	0.3

## Sheet: ST10. T2D loci in LADACTRL
Loci surpassing Bonferroni-significance threshold are in bold (P < 0.0007); nominally significant are highlighted. All loci are given for T2D risk-increasing allele. Power calculations using CaTS calculator. (http://csg.sph.umich.edu/abecasis/cats/) Number of cases: 2700, number of controls: 5500. Disease prevalence of 0.0036. Published effect size are derived from odds ratios used in Mishra et a…
																									Power to detect signal
SNP	chr:pos	reference_allele	other_allele	eaf	OR	OR_se	OR_95L	OR_95U	z	P	_-log10_p-value	q_statistic	q_p-value	i2	n_studies	n_samples	effects	LOCUS	AverageCall	Rsq	Genotyped	Risk Allele	Disease risk allele frequency in LADA cohort	Published effect size	α = 0.00000005	α = 0.05
rs10842994	12:27965150	C	T	0.198885	1.16899	0.037109	1.0696	1.27762	-3.44404	0.000633	3.19834	1.896338	0.594198	0.000000	4	9415	----	KLHDC5	0.99757	0.98748	Imputed	C	0.198885	1.09	0.001	0.556
rs10401969	19:19407718	T	C	0.088191	0.820127	0.071664	0.725651	0.926902	3.17562	0.001628	2.78828	0.806479	0.847917	0.000000	4	9415	++++	CILP2	0.99885	0.98822	Imputed	C	0.911809	1.13	-	0.547
rs10203174	2:43690030	C	T	0.109977	1.19347	0.046415	1.06389	1.33884	-3.01615	0.002765	2.55828	3.069089	0.381095	0.022511	4	9414	----	THADA	0.99902	0.99292	Imputed	C	0.109977	1.15	-	0.767
rs11634397	15:80432222	G	A	0.642267	1.12068	0.041334	1.03967	1.20801	2.97603	0.003148	2.50201	5.130387	0.162495	0.415249	4	9415	+++-	ZFAND6	0.97661	0.92318	Imputed	G	0.642267	1.09	-	0.701
rs8108269	19:46158513	G	T	0.307588	1.11158	0.041679	1.02989	1.19975	2.7163	0.00703	2.15304	2.230896	0.525888	0.000000	4	9414	+++-	GIPR	0.99968	0.99879	Genotyped	G	0.307588	1.06	-	0.372
rs7903146	10:114758349	T	C	0.280399	1.10755	0.042277	1.02469	1.19712	2.57474	0.010617	1.974	4.975015	0.173636	0.396987	4	9415	+-++	TCF7L2	0.97237	0.89642	Imputed	T	0.280399	1.4	1	1
rs10923931	1:120517959	T	G	0.102189	1.15996	0.06446	1.03361	1.30174	2.52191	0.012326	1.90917	4.832007	0.184520	0.379140	4	9415	++-+	NOTCH2	0.99031	0.93035	Imputed	T	0.102189	1.11	-	0.483
rs849135	7:28196413	G	A	0.475931	1.08782	0.031817	1.01402	1.16699	-2.34861	0.019763	1.70414	5.834643	0.119938	0.485830	4	9414	+---	JAZF1	0.99948	0.99825	Imputed	G	0.475931	1.12	0.021	0.928
rs9936385	16:53819169	C	T	0.411312	1.08799	0.037934	1.01364	1.16779	2.33505	0.020484	1.6886	4.716596	0.193765	0.363948	4	9415	++++	FTO	0.9998	0.99944	Genotyped	C	0.411312	1.13	0.035	0.954
rs163184	11:2847069	G	T	0.488018	1.08715	0.037715	1.01323	1.16647	2.32582	0.020987	1.67805	2.876869	0.411002	0.000000	4	9415	++++	KCNQ1	0.97639	0.92469	Imputed	G	0.488018	1.09	-	0.74
rs7403531	15:38822905	T	C	0.712885	1.11062	0.044766	1.00239	1.23053	-2.00568	0.046516	1.3324	2.754996	0.252209	0.274046	3	7047	-?--	RASGRP1	0.96912	0.86089	Imputed	T	0.712885	1.02	-	0.084
rs4275659	12:123447928	C	T	0.674558	1.08089	0.041608	0.999335	1.16909	1.94339	0.053745	1.26966	7.982544	0.046374	0.624180	4	9415	-+++	MPHOSPH9	0.97022	0.88621	Imputed	C	0.674558	1.07	-	0.482
rs516946	8:41519248	C	T	0.724109	1.0863	0.045166	0.997769	1.18267	1.90851	0.058187	1.23518	3.286679	0.349501	0.087225	4	9414	++++	ANK1	0.97022	0.88621	Imputed	C	0.674558	1.07	-	0.482
rs2796441	9:84308948	G	A	0.406021	1.07211	0.032874	0.998051	1.15167	-1.90657	0.058442	1.23327	4.572886	0.205880	0.343959	4	9414	-+--	TLE1	0.99962	0.99875	Genotyped	G	0.406021	1.07	-	0.522
rs17168486	7:14898282	T	C	0.178009	1.09155	0.048694	0.996111	1.19614	1.87654	0.062523	1.20396	3.763064	0.288212	0.202777	4	9415	+++-	DGKB	0.99547	0.97845	Imputed	T	0.178009	1.13	-	0.819
rs2943640	2:227093585	C	A	0.622843	1.06896	0.038628	0.993246	1.15044	1.7792	0.077397	1.11128	0.774823	0.855479	0.000000	4	9414	++++	IRS1	0.99758	0.99089	Imputed	C	0.622843	1.09	-	0.712
rs6878122	5:76427311	G	A	0.680662	1.07201	0.035771	0.99144	1.15913	-1.74434	0.08338	1.07894	7.854572	0.049115	0.618057	4	9415	-++-	ZBED3	0.99149	0.96632	Imputed	G	0.680662	1.13	0.03	0.928
rs4458523	4:6289986	G	T	0.569797	1.06568	0.037539	0.992107	1.14472	1.74291	0.083632	1.07763	0.093982	0.992550	0.000000	4	9414	++++	WFS1	0.99578	0.98712	Imputed	G	0.569797	1.09	-	0.73
rs6723108	2:135479980	T	G	0.486007	1.06457	0.037612	0.990848	1.14377	1.70888	0.089843	1.04652	2.095228	0.552879	0.000000	4	9415	++++	TMEM163	0.93865	0.80301	Imputed	T	0.486007	1.01	-	0.06
rs4402960	3:185511687	T	G	0.300696	1.06767	0.04046	0.988372	1.15334	1.66297	0.098806	1.00521	1.513147	0.679239	0.000000	4	9415	+-++	IGF2BP	0.99909	0.99666	Imputed	T	0.300696	1.13	0.029	0.927
rs7756992	6:20679709	G	A	0.283486	1.06793	0.040662	0.988227	1.15405	1.66072	0.099263	1.00321	1.454042	0.692917	0.000000	4	9415	+++-	CDKAL1	0.9969	0.98911	Imputed	G	0.283486	1.2	0.33	0.999
rs1552224	11:72433098	A	C	0.170898	0.926365	0.049394	0.843286	1.01763	1.59548	0.113263	0.94591	5.508556	0.138128	0.455393	4	9415	++-+	ARAP1 (CENTD2)	0.99994	0.99965	Genotyped	A	0.170898	1.13	-	0.802
rs2334499	11:1696849	T	C	0.424215	0.946657	0.033149	0.881684	1.01642	-1.51111	0.133623	0.87412	1.056249	0.787645	0.000000	4	9414	----	DUSP8	0.96986	0.90614	Imputed	T	0.424215	1.07	-	0.524
rs10811661	9:22134094	T	C	0.160038	1.07862	0.044271	0.977665	1.18999	-1.50948	0.134043	0.872756	4.490844	0.213108	0.331974	4	9414	+---	CDKN2A/B	0.99828	0.98842	Imputed	T	0.160038	1.19	0.064	0.975
rs243088	2:60568745	T	A	0.474934	1.05359	0.036862	0.981344	1.13116	1.4404	0.152776	0.815944	3.395136	0.334619	0.116383	4	9414	+-+-	BCL11A	0.99521	0.98421	Imputed	T	0.474934	1.09	-	0.739
rs6813195	4:153520475	T	C	0.283849	0.944706	0.036143	0.873865	1.02129	-1.4303	0.155676	0.807778	4.346546	0.226393	0.309797	4	9414	---+	TMEM154	0.99889	0.99601	Genotyped	C	0.716151	1.08	-	0.546
rs12970134	18:57884750	A	G	0.277323	1.05491	0.040851	0.974844	1.14156	1.32736	0.187638	0.726679	3.174781	0.365454	0.055053	4	9415	++--	MC4R	0.99981	0.99923	Genotyped	A	0.277323	1.08	-	0.555
rs12899811	15:91544076	A	G	0.310594	0.952477	0.039164	0.882838	1.02761	1.25692	0.212152	0.673354	1.999129	0.572587	0.000000	4	9414	+-++	PRC1	0.91964	0.74026	Imputed	G	0.689406	1.09	-	0.668
rs17106184	1:50909985	G	A	0.103915	1.07677	0.051724	0.959224	1.20871	-1.25412	0.213172	0.671269	1.154025	0.764051	0.000000	4	9414	----	FAF1	0.99712	0.97558	Imputed	G	0.103915	1.11	-	0.483
rs2075423	1:214154719	G	T	0.345125	1.04742	0.034501	0.973228	1.12726	-1.236	0.219857	0.65786	2.433954	0.487345	0.000000	4	9414	-+--	PROX1	0.98715	0.95577	Imputed	G	0.345125	1.08	-	0.608
rs17791513	9:81905590	A	G	0.070557	1.09053	0.060121	0.950395	1.25134	-1.235	0.22023	0.657123	0.917281	0.821256	0.000000	4	9414	--+-	TLE4	0.99184	0.90305	Imputed	A	0.070557	1.21	0.011	0.855
rs7845219	8:95937502	T	C	0.450720	1.04366	0.033333	0.972498	1.12003	-1.18603	0.239076	0.621464	1.336483	0.720489	0.000000	4	9414	----	TP53INP1	0.99821	0.99509	Imputed	T	0.45072	1.08	-	0.639
rs6808574	3:187740523	T	C	0.594051	0.958682	0.036993	0.892044	1.0303	1.14796	0.254489	0.594331	4.030029	0.258240	0.255588	4	9414	++-+	LPP	0.98842	0.96312	Imputed	C	0.405949	1.08	-	0.63
rs7041847	9:4287466	A	G	0.496270	1.0389	0.033471	0.968095	1.11489	-1.05969	0.292852	0.533352	4.199154	0.240747	0.285570	4	9414	+---	GLIS3	0.99314	0.97714	Imputed	A	0.49627	1.05	-	0.314
rs7163757	15:62391608	C	T	0.444388	0.965298	0.036098	0.899371	1.03606	0.978575	0.331372	0.479685	4.202134	0.240448	0.286077	4	9414	+++-	C2CD4A	0.99994	0.99978	Genotyped	C	0.444388	1.06	-	0.417
rs9470794	6:38106844	C	T	0.080046	0.938494	0.05757	0.825656	1.06675	-0.971277	0.334991	0.474968	0.900756	0.825245	0.000000	4	9414	--+-	ZFAND3	0.99457	0.95266	Imputed	T	0.919954	1.01	-	0.053
rs6795735	3:64705365	T	C	0.404387	0.965541	0.034047	0.898809	1.03723	-0.959698	0.340785	0.467519	3.985728	0.263009	0.247314	4	9414	+---	ADAMTS9	0.99419	0.981	Imputed	C	0.404387	1.07	-	0.519
rs459193	5:55806751	G	A	0.702712	1.03959	0.040996	0.959237	1.12667	0.945976	0.347735	0.458752	4.414323	0.220061	0.320394	4	9414	++-+	ANKRD55	0.9996	0.99852	Genotyped	G	0.702712	1.05	-	0.27
rs831571	3:64048297	C	T	0.760895	1.04527	0.047027	0.953095	1.14636	0.940017	0.350781	0.454964	0.331310	0.954036	0.000000	4	9414	++++	PSMD6	0.99034	0.95431	Imputed	C	0.760895	1.03	-	0.118
rs2261181	12:66212318	T	C	0.086405	1.05812	0.063589	0.933483	1.19939	0.883488	0.380511	0.419633	0.891362	0.827512	0.000000	4	9415	+++-	HMGA2	0.99715	0.97925	Imputed	T	0.086405	1.16	-	0.744
rs7178572	15:77747190	G	A	0.673874	0.965848	0.036773	0.893772	1.04374	-0.878186	0.383377	0.416374	5.407849	0.144255	0.445251	4	9414	+-+-	HMG20A	0.99704	0.98779	Imputed	G	0.673874	1.08	-	0.586
rs11717195	3:123082398	T	C	0.237599	1.03363	0.038982	0.952001	1.12226	-0.788091	0.434069	0.362441	1.327602	0.722589	0.000000	4	9414	---+	ADCY5	0.99606	0.98117	Imputed	T	0.237599	1.09	-	0.61
rs3786897	19:33893008	A	G	0.427587	1.02879	0.033995	0.958271	1.1045	-0.783499	0.436752	0.359765	0.471945	0.925010	0.000000	4	9414	--+-	PEPD	0.96442	0.88308	Imputed	A	0.427587	1.02	-	0.091
rs1359790	13:80717156	G	A	0.265417	0.969672	0.040429	0.895165	1.05038	0.755027	0.453602	0.343325	0.545438	0.908801	0.000000	4	9414	+-++	SPRY2	0.99976	0.99901	Genotyped	G	0.265417	1.11	-	0.805
rs10830963	11:92708710	C	G	0.283857	1.03072	0.037401	0.952845	1.11497	-0.754951	0.453648	0.343281	0.219856	0.974322	0.000000	4	9414	---+	MTNR1B	0.96662	0.87361	Imputed	G	0.716143	1.11	-	0.802
rs1111875	10:94462882	C	T	0.407839	1.02733	0.03406	0.956876	1.10297	-0.743875	0.460301	0.336958	5.037285	0.169087	0.404441	4	9415	--++	HHEX/IDE	0.99865	0.99483	Imputed	C	0.407839	1.15	0.1	0.986
rs4430796	17:36098040	A	G	0.525127	1.02642	0.035765	0.95632	1.10166	0.722506	0.473289	0.324874	3.262344	0.352918	0.080416	4	9415	--++	HNF1B	0.98054	0.94075	Imputed	G	0.474873	1.13	0.039	0.958
rs7612463	3:23336450	A	C	0.124648	1.03805	0.053744	0.932707	1.15528	0.68395	0.497224	0.303447	0.730460	0.866017	0.000000	4	9415	-+++	UBE2E2	0.99979	0.99881	Genotyped	C	0.875352	1.11	-	0.525
rs1802295	10:70931474	T	C	0.339888	0.974953	0.035709	0.904964	1.05035	-0.667398	0.507695	0.294397	0.996860	0.802012	0.000000	4	9414	--++	VPS26A	0.99982	0.99918	Genotyped	T	0.339888	1.02	-	0.088
rs12427353	12:121426901	G	C	0.197881	1.02338	0.041684	0.937817	1.11675	-0.518839	0.606577	0.217114	13.097164	0.004431	0.770943	4	9414	+-++	HNF1A	0.9977	0.98703	Imputed	G	0.197881	1.12	-	0.953
rs3802177	8:118185025	G	A	0.312392	0.981045	0.037845	0.909654	1.05804	0.496437	0.622203	0.206068	5.187533	0.158569	0.421690	4	9415	++-+	SLC30A8	0.92842	0.75289	Imputed	G	0.312392	1.16	0.141	0.987
rs702634	5:53271420	A	G	0.656504	0.982161	0.036518	0.910587	1.05936	-0.466244	0.643534	0.191429	0.848928	0.837732	0.000000	4	9414	+-+-	ARL15	0.99949	0.99813	Genotyped	A	0.656504	1.08	-	0.592
rs11063069	12:4374373	G	A	0.205976	1.01877	0.043011	0.934465	1.11067	0.421907	0.675393	0.170444	1.818071	0.611010	0.000000	4	9414	+-++	CCND2	0.90818	0.59224	Imputed	G	0.205976	1.11	-	0.737
rs4812829	20:42989267	A	G	0.170153	0.980576	0.044434	0.893484	1.07616	-0.413353	0.681608	0.166465	1.073582	0.783455	0.000000	4	9414	---+	HNF4A	0.99378	0.96158	Imputed	A	0.170153	1.07	-	0.34
rs7955901	12:71433293	T	C	0.544533	1.0145	0.035135	0.945635	1.08838	0.401403	0.690328	0.160944	6.318490	0.097102	0.525203	4	9414	+-++	TSPAN8	0.99777	0.99335	Imputed	C	0.455467	1.09	-	0.739
rs13233731	7:130437689	G	A	0.495413	0.986379	0.035111	0.919424	1.05821	0.38241	0.704272	0.15226	2.679499	0.443723	0.000000	4	9414	+-+-	KLF14	0.99989	0.99963	Imputed	G	0.495413	1.11	0.011	0.883
rs6467136	7:127164958	G	A	0.529215	1.00689	0.034747	0.93878	1.07993	0.192018	0.848828	0.071181	3.862061	0.276749	0.223213	4	9414	+---	GCC1	0.99828	0.99485	Imputed	A	0.470785	1.01	-	0.06
rs10278336	7:44245363	G	A	0.435113	1.00635	0.034931	0.937884	1.07981	0.176039	0.861271	0.06486	1.571713	0.665821	0.000000	4	9414	-+++	GCK	0.99398	0.98044	Imputed	A	0.435113	1.05	-	0.31
rs780094	2:27741237	C	T	0.607382	1.00443	0.036179	0.933523	1.08073	0.118441	0.906392	0.042684	0.486380	0.921873	0.000000	4	9415	+++-	GCKR	0.99984	0.99937	Genotyped	C	0.607382	1.04	-	0.211
rs5215	11:17408630	T	C	0.597430	0.995731	0.035337	0.92647	1.07017	-0.116304	0.908073	0.041879	1.987928	0.574916	0.000000	4	9414	+-+-	KCNJ11	0.9982	0.9941	Imputed	C	0.40257	1.08	-	0.627
rs2028299	15:90374257	C	A	0.674968	1.00431	0.038224	0.928746	1.08603	-0.10783	0.914743	0.038701	0.135107	0.987315	0.000000	4	9414	-+-+	AP3S2	0.99535	0.98243	Imputed	C	0.674968	1.04	-	0.199
rs16861329	3:186666461	C	T	0.121559	1.00418	0.051435	0.902524	1.11729	-0.076625	0.939353	0.027171	4.751484	0.190926	0.368618	4	9414	+-+-	ST64GAL1	0.97976	0.87244	Imputed	C	0.121559	1.03	-	0.09
rs9505118	6:7290437	G	A	0.412214	1.00208	0.035047	0.933385	1.07582	0.057258	0.95466	0.020151	2.601314	0.457259	0.000000	4	9414	+++-	SSR1/RREB1	0.99994	0.99978	Genotyped	A	0.587786	1.07	-	0.518
rs7593730	2:161171454	C	T	0.745034	0.999128	0.042645	0.915545	1.09034	-0.019564	0.984499	0.006785	0.852991	0.836755	0.000000	4	9415	-++-	RBMS1	0.99999	0.99996	Genotyped	C	0.745034	1.11	-	0.772
rs12571751	10:80942631	A	G	0.462734	0.999867	0.034745	0.931786	1.07292	0.003692	0.997074	0.001273	2.752540	0.431372	0.000000	4	9414	++-+	ZMIZ1	0.99952	0.99862	Genotyped	A	0.462734	1.09	-	0.738

[truncated: 3 more sheets: ST11. GAD tertiles, ST12. HLA, ST13. TCF7L2]
